1 **Title:** Impact of COVID-19 and Effects of Vaccination with BNT162b2 on Patient-Reported  
2 Health-Related Quality of Life, Symptoms, and Work Productivity Among US Adult Outpatients  
3 with SARS-CoV-2

4  
5 **Authors:** Manuela Di Fusco<sup>1\*</sup>, Xiaowu Sun<sup>2</sup>, Mary M. Moran<sup>3</sup>, Henriette Coetzer<sup>2</sup>, Joann M.  
6 Zamparo<sup>3</sup>, Laura Puzniak<sup>3</sup>, Mary B. Alvarez<sup>4</sup>, Ying P. Tabak<sup>2</sup>, Joseph C. Cappelleri<sup>5</sup>

7  
8 **Affiliations:**

9 <sup>1</sup> Pfizer Inc., Health Economics and Outcomes Research, New York, NY, USA

10 <sup>2</sup> CVS Health, Woonsocket, RI, USA

11 <sup>3</sup> Pfizer Inc., MDSCA Vaccines, Collegeville, PA, USA

12 <sup>4</sup> Pfizer Inc., Field Medical Outcomes and Analytics, New York, NY, USA

13 <sup>5</sup> Pfizer Inc., Statistical Research and Data Science Center, Groton, CT, USA

14

15 **\* Corresponding author:**

16 Manuela Di Fusco

17 Health Economics and Outcomes Research

18 Pfizer, Inc., New York, NY, USA

19 [Manuela.difusco@pfizer.com](mailto:Manuela.difusco@pfizer.com)

20

21

22

23

24 **ABSTRACT**

25 **Background:** Although there is extensive literature on the clinical benefits of COVID-19  
26 vaccination, data on humanistic effects are limited. This study evaluated the impact of SARS-  
27 CoV-2 infection on symptoms, Health Related Quality of Life (HRQoL) and Work Productivity  
28 and Impairment (WPAI) prior to and one month following infection, and compared results  
29 between individuals vaccinated with BNT162b2 and those unvaccinated.

30 **Methods:** Subjects with  $\geq 1$  self-reported symptom and positive RT-PCR for SARS-CoV-2 at  
31 CVS Health US test sites were recruited between 01/31/2022-04/30/2022. Socio-demographics,  
32 clinical characteristics and vaccination status were evaluated. Self-reported symptoms, HRQoL,  
33 and WPAI outcomes were assessed using questionnaires and validated instruments (EQ-5D-5L,  
34 WPAI-GH) across acute COVID time points from pre-COVID to Week 4, and between  
35 vaccination groups. Mixed models for repeated measures were conducted for multivariable  
36 analyses, adjusting for several covariates. Effect size (ES) of Cohen's d was calculated to  
37 quantify the magnitude of outcome changes within and between vaccination groups.

38 **Results:** The study population included 430 subjects: 197 unvaccinated and 233 vaccinated with  
39 BNT162b2. Mean (SD) age was 42.4 years (14.3), 76.0% were female, 38.8% reported prior  
40 infection and 24.2% at least one comorbidity. Statistically significant differences in outcomes  
41 were observed compared with baseline and between groups. The EQ-Visual analogue scale  
42 scores and Utility Index dropped in both cohorts at Day 3 and increased by Week 4, but did not  
43 return to pre-COVID levels. The mean changes were statistically lower in the BNT162b2 cohort  
44 at Day 3 and Week 4. The BNT162b2 cohort reported lower prevalence and fewer symptoms at  
45 index date and Week 4. At Week 1, COVID-19 had a large impact on all WPAI-GH domains:  
46 the work productivity time loss among unvaccinated and vaccinated was 65.0% and 53.8%, and

47 the mean activity impairment was 50.2% and 43.9%, respectively. With the exception of  
48 absenteeism at Week 4, the BNT162b2 cohort was associated with statistically significant less  
49 worsening in all WPAI-GH scores at both Week 1 and 4.

50 **Conclusions:** COVID-19 negatively impacted HRQoL and work productivity among mildly  
51 symptomatic outpatients. Compared with unvaccinated, those vaccinated with BNT162b2 were  
52 less impacted by COVID-19 infection and recovered faster.

53

54 **Keywords:** COVID-19, SARS-CoV-2, HRQoL, WPAI, Quality of Life, COVID-19 symptoms,  
55 BNT162b2, humanistic

## 56 **BACKGROUND**

57 The impact of the COVID-19 pandemic on the sustainability of quality of life of patients has  
58 been reported globally [1-4]. The prolonged multisystem symptoms associated to SARS-CoV-2  
59 infection can negatively affect daily activities, ability to work, and social interactions, leading to  
60 poor health-related quality of life (HRQoL) [1-4].

61 The introduction of COVID-19 vaccination has significantly impacted the COVID-19 response,  
62 and evidence regarding the efficacy, safety and effectiveness of vaccination is extensive [5].

63 However, there is limited research on the potential benefits of vaccination on physical, mental,  
64 social, emotional functioning and economic well-being. Most of the studies assessing humanistic  
65 outcomes of COVID-19 infection have been limited to inpatients [1, 2, 6] were conducted  
66 outside of the US or focused on specific disease states and organ-specific functions [7-9].

67 Leveraging a US national retail pharmacy SARS-CoV-2 test database and using validated  
68 patient-reported outcome measures (PROMs), this study assessed COVID-19 symptoms,  
69 HRQoL and WPAI prior to through one month following SARS-CoV-2 infection in outpatients,  
70 and compared results between unvaccinated individuals and those vaccinated with BNT162b2.

71

## 72 **METHODS**

### 73 **Study Design and Participants**

74 The source population consisted of individuals testing for SARS-CoV-2 at one of ~5,000 CVS  
75 Health test sites across the US. As part of the registration process for scheduling a SARS-CoV-2  
76 test at CVS Health, individuals are required to complete a screening questionnaire including  
77 demographics, symptoms, comorbidities, and vaccination status. The screening variables and

78 RT-PCR test results are loaded in an analytic dataset, where ~80-90% of test results are reported  
79 within 2-3 days. Leveraging this analytic platform, this study was designed as a prospective  
80 survey-based patient-reported outcomes study targeting adults  $\geq 18$  with a positive RT-PCR test  
81 result and self-reporting at least one symptom. These individuals were emailed an invitation as  
82 soon as the test results became available, no later than 4 days from testing. The email invitation  
83 directed the potential participants to an e-consent website to learn about the study, survey  
84 schedule and informed consent. Figure 1 summarizes the study design. Recruitment of  
85 participants was carried out between 01/31/2022 and 04/30/2022 (Ct.gov NCT05160636).

86

## 87 **Data Sources and Variables**

### 88 *Baseline characteristics and symptoms*

89 Baseline characteristics of the participants were obtained via the CVS Health pre-test screening  
90 questionnaire. These included self-reported demographics, comorbidities (including  
91 immunocompromised status), COVID-19 vaccination history, social determinants of health  
92 including the Social Vulnerability Index (SVI), work and/or residency in a high-risk or  
93 healthcare setting, and symptoms. The list of baseline COVID-19 symptoms was based on the  
94 CDC [10].

95

### 96 *Exposure groups*

97 Immunocompetent participants were considered fully vaccinated with BNT162b2 if they self-  
98 reported receipt of 2 doses of BNT162b2  $\geq 14$  days of SARS-CoV-2 testing. They were  
99 considered partially vaccinated if reporting receipt of a single dose and boosted if reporting  
100 receipt of 3 doses. Participants self-reporting an immunocompromising condition and receipt of

101 3 doses were considered fully vaccinated (i.e., 3-dose primary series completion); if reporting 4  
102 doses, they were considered boosted. Participants were considered unvaccinated if they did not  
103 report any COVID-19 vaccine dose prior to testing. Heterologous schedules were excluded.

104

#### 105 *HRQoL*

106 To assess HRQoL, we used the validated EQ-5D-5L questionnaire [11, 12]. On the day of  
107 enrollment, consented participants completed the EQ-5D-5L questionnaire twice, using two  
108 versions: a modified version where all the questions were past tense to retrospectively assess pre-  
109 COVID-19 baseline QoL, and the standard version in present tense to assess current QoL. To  
110 minimize responder bias, the order of administration of the two versions was random.

111 Subsequent completion was requested at one month (short-term study design in Figure 1). The  
112 EQ-5D-5L results at each time point were converted into the Utility Index (UI) using the US-  
113 based weights by Pickard et al [12, 13].

114

#### 115 *Work Productivity and Activity Impairment*

116 To measure impairments in both paid work and unpaid work, we used the Work Productivity and  
117 Activity Impairment General Health V2.0 (WPAI:GH) measure [14, 15]. Participants were asked  
118 to complete this questionnaire twice, seven days after their RT-PCR test: once referencing seven  
119 days prior to COVID-19 symptom onset and an additional assessment referencing the past seven  
120 days. Similar to the EQ-5D-5L, subsequent completion of the WPAI was requested at one month  
121 (Figure 1). Four WPAI scores were computed at each time point: percent of worktime missed  
122 (absenteeism), percent of impairment while working (presenteeism), percent of work

123 productivity loss (considering both absenteeism and presenteeism), and percent of activity  
124 impairment. Only employed subjects were included for work productivity analyses.

125

### 126 *Post-COVID 19 Symptoms and Vaccination Status Update*

127 To supplement the pre-test screening questionnaire and enable the collection of on-going or new  
128 symptoms after the acute phase, participants were sent an additional survey four weeks following  
129 the test asking to complete a checklist of COVID-19 related symptoms based on the CDC list  
130 [16], To confirm vaccination status, participants' subsequent responses to vaccination date  
131 questions were compared with their index responses; if responses did not match, the information  
132 was queried and adjudicated, and the latest information was typically used.

133

### 134 **Statistical Analysis**

135 Descriptive statistics were used to analyze participant characteristics at baseline. Continuous  
136 variables were described using means and standard deviations. Categorical variables were  
137 reported using number and percentage distributions. For continuous variables, t-tests were used  
138 to test difference in means and Wilcoxon tests were used to test difference in medians. For  
139 categorical variables, chi-square tests were used to test differences between groups. When cell  
140 frequency was less than 5, Fisher's exact tests were used for 2-by-2 tables and Freeman-Halton  
141 tests for r-by-c tables [17, 18]. P values were all two-sided and not adjusted for multiplicity.  
142 Mixed models for repeated measures (MMRM) [19] were used to estimate the magnitude of  
143 COVID-19 impact on HRQoL and WPAI over time. Models included variables of time, self-  
144 reported SARS-CoV-2 vaccination status, and interaction of time by vaccination status, as well  
145 as covariates of participant pre-COVID-19 symptom onset score, sociodemographic

146 characteristics (age, sex, regions, social vulnerability, race/ethnicity, high risk occupations),  
147 previously tested positive for COVID-19, severity of acute illness (number of symptoms reported  
148 on index date), and immunocompromised status. Assessment time was fitted as a categorical  
149 covariate and a repeated effect (repeated by subject). Least squares mean (LS mean) and  
150 standard errors of PRO scores for each time point of assessment were calculated. Per guidelines,  
151 no adjustment was made for missing data when scoring the EQ-5D-5L UI and WPAI [11, 15].  
152 Missing data at each time were not imputed. All available data were included in the analysis.  
153  
154 Cohen's d, or a variation of it, was calculated to assess the magnitude of score change from  
155 baseline within the BNT162b2 vaccinated cohort and, separately, the unvaccinated cohort, as  
156 well as the difference between BNT162b2 and unvaccinated cohorts [20, 21]. Specifically,  
157 within-cohort effect size (ES) was calculated as mean change from baseline to follow-up, divided  
158 by the standard deviation of change scores from baseline to follow-up. Between-cohort ES was  
159 calculated as the difference in mean changes from baseline between cohorts, divided by the  
160 pooled standard deviation of change scores. When calculating model based ESs, the numerators  
161 were the predicted mean change from the model for within-cohort ESs, and predicted differences  
162 from the model for between-cohort ESs. Denominators were the corresponding observed  
163 standard deviations. Values of 0.2, 0.5, and 0.8 standard deviation (SD) units represent small,  
164 medium, and large ES, respectively. These cut-off estimates have been widely used to establish  
165 important differences in HRQoL studies [22]. As such, we considered the magnitude of  
166 (standardized) effect sizes of at least 0.20 SD units as important or meaningful differences in  
167 gauging the magnitude of within-patient change and between-group differences. All data  
168 obtained were collected and analyzed with SAS Version 9.4 (SAS Institute, Cary, NC). The



169 study followed the Strengthening the Reporting of Observational Studies in Epidemiology  
170 (STROBE) reporting guideline [23].

171

## 172 **RESULTS**

### 173 **Baseline characteristics**

174 A total of 39,889 eligible candidates were outreached. Of those, 676 consented and completed  
175 the first survey, for a consent rate of 1.7%. Compared with individuals in the CVS Health  
176 analytic dataset who did not participate in our study, the study sample was over-represented by  
177 women and Caucasians, with slightly more individuals vaccinated and with comorbidities  
178 (Supplemental Table 1). The final study population included 430 subjects (Figure 2). 100%  
179 completed the EQ-5D-5L questionnaire at pre-COVID-19 baseline and at Day 3, and 77.0%  
180 completed it at Week 4. The WPAI-GH questionnaire was completed by 88.1% of the  
181 participants at pre-COVID-19 baseline, 88.1% at Week 1 and 76.9% at Week 4.

182 The sociodemographic characteristics of the baseline participants are shown in Table 1. Overall,  
183 the mean (SD) age was 42.4 (14.3), 76% were female, 68.6% Caucasian, 58.7% from Southern  
184 US. There were 24.2% participants who reported  $\geq 1$  comorbidities, including 4.4% with  
185 immunocompromising conditions and 39% reported a previous COVID-19 infection.

186 About 46% (197) were unvaccinated and 54% (233) were vaccinated with BNT162b2; of those,  
187 respectively 140 (60%) and 93 (40%) received 2 and 3 doses. Compared with unvaccinated,  
188 BNT162b2 participants were comparable with respect to gender, working and living settings, and  
189 comorbidities, slight older with mean age 43.7 vs. 40.9 ( $p=0.049$ ); living in less vulnerable area  
190 with lower mean social vulnerability index (0.40 vs. 0.49,  $P<<0.001$ ); and slight differences in

191 race/ethnicity and region. In the vaccinated group, mean (SD) time since vaccination before  
192 infection was 186 (105) days.  
193 At index date, the most reported acute symptoms were respiratory and systemic. BNT162b2  
194 vaccinated participants reported fewer overall acute COVID-19 symptoms on average than  
195 unvaccinated participants, mean 5.1 vs. 5.6,  $P=0.034$  (Table 1). Directionally, the proportions of  
196 all systemic and GI-related symptoms were numerically lower in the BNT162b2 cohort. Relative  
197 to unvaccinated, those vaccinated with BNT162b2 reported significantly fewer symptoms of  
198 fever (30.5% vs. 47.2%  $P<0.001$ ), chills (42.9% vs. 57.4%,  $P=0.003$ ), muscle or body aches  
199 (49.4% vs. 59.4%,  $P=0.038$ ), and diarrhea (15.9% vs. 25.9%,  $P=0.010$ ), but more congestion or  
200 runny nose (80.7% vs. 68.0%,  $P=0.003$ ).

201

### 202 **Post-COVID-19 symptoms**

203 At Week 4, the mean number of symptoms was statistically lower in the BNT162B2 cohort (2.5  
204 vs. 3.7,  $p=0.002$ ). The overall prevalence decreased over time too, especially fever, cough,  
205 headache, fatigue, diarrhea, muscle pain; however, ~70% of participants still reported at least 1  
206 post-COVID-19 symptom. Directionally, the proportions of all symptoms were numerically  
207 lower in the BNT162b2 cohort. Symptoms of worsening after physical or mental activities  
208 (10.3% vs. 20.6%), general pain/discomfort (11.4% vs. 19.4%), change in smell or taste (10.9%  
209 vs. 20.6%), headache (16.0% vs. 25.2%), sleep problems (20.0% vs. 29.7%), mood changes  
210 (7.4% vs. 14.8%), memory loss (6.3% vs. 17.4%) and diarrhea (3.4% vs. 11.0%) were  
211 statistically significant ( $P < 0.05$ ) (Table 2).

212

### 213 **Health-Related Quality of life**

214 *Utility Index scores*

215 Mean pre-COVID-19 baseline UIs did not differ between the BNT162b2 and unvaccinated  
216 cohorts, respectively 0.924 and 0.918 ( $P=0.547$ ). COVID-19 infection had a detrimental effect  
217 on the HRQoL of participants, especially during the acute episode (Day 3). In both the  
218 BNT162b2 and the unvaccinated cohorts, UIs were lower at Day 3 and Week 4 relative to pre-  
219 COVID-19. While UIs improvement was observed over time, the UI did not return to pre-  
220 COVID levels at Week 4 (Table 3).

221 The BNT162B2 cohort was less impacted than the unvaccinated cohort, at both Day 3 and Week  
222 4. After controlling for pre-COVID baseline score and other covariates, the least-square estimate  
223 UI scores at Day 3 were, respectively 0.77 and 0.84 in the unvaccinated and BNT162B2 cohorts  
224 (Table 4). Moderate ESs of, respectively, 0.64 and 0.49 were observed from baseline. At Week  
225 4, the least-square estimate UI scores were, respectively, 0.86 and 0.90. Small-to-moderate ESs  
226 of, respectively, 0.38 and 0.13 were observed from baseline. The differences between the two  
227 groups were statistically significant ( $P<0.05$ ). (Table 4) Small-to-medium ESs between cohorts  
228 were observed and were 0.36 and 0.32 for Day 3 and Week 4, respectively. (Table 4,  
229 Supplemental Figure 1 and 2)

230

231 *EQ-VAS*

232 The pattern of EQ-VAS scores was similar to that observed for UIs. Mean pre-COVID-19  
233 baseline EQ-VAS were similar for the BNT162b2 and unvaccinated cohorts, respectively 86.9  
234 and 87.8 ( $P=0.414$ ) (Table 3). Similar to the UIs, the pre-COVID EQ-VAS were rated relatively  
235 high by the participants, indicating a generally healthy cohort. The least-square estimate EQ-  
236 VAS scores for the BNT162b2 and unvaccinated cohorts were, respectively, 76.2 and 72.6 at

237 Day 3 and 85.0 and 81.6 at Week 4. After controlling for pre-COVID-19 baseline score and  
238 other covariates, the least-square estimates of change from pre-COVID-19 baseline in EQ VAS  
239 for the BNT162B2 and the unvaccinated cohort were -11.1 and -14.8, respectively on Day 3, and  
240 -2.3 and -5.7, respectively at Week 4. COVID-19 had a large adverse impact on EQ-VAS with  
241 an ES of -0.89 for BNT162B2 cohort and -0.86 for Unvaccinated cohort on Day 3, and small ES  
242 (-0.22) for BNT162B2 cohort and approaching medium ES (-0.42) for Unvaccinated cohort at  
243 Week 4. BNT162B2 cohort was associated with 3.6 (P=0.013) on Day 3 and 3.4 (P=0.016) at  
244 Week 4 less drop in EQ VAS than the Unvaccinated cohort. The ESs between cohorts were  
245 small yet relevant, being 0.25 and 0.28 for Day 3 and Week 4, respectively (Table 4,  
246 Supplemental Figure 1 and 2).

247

#### 248 *EQ-5D-5L dimensions*

249 The health status of the study participants according to the dimensions of EQ-5D-5L is reported  
250 in Figure 3 and Supplemental Table 2. In both groups, at Day 3, over half of the cohort reported  
251 problems in usual activities, pain/discomfort and anxiety/depression, while the vast majority  
252 reported no or slight problems in mobility and self-care. At Week 4, the vast majority continued  
253 to report no or slight problems with mobility, self-care, as well as for usual activities; most  
254 reported no, slight or moderate problems with pain/discomfort and anxiety/depression.  
255 BNT162b2 cohort had lower mean responses across all 5 domains at both Day 3 and Week 4  
256 relative to unvaccinated.

257

#### 258 **Work Productivity and Activity Impairment**

259 Approximately 65% of participants reported being currently employed at baseline (155 in the  
260 BNT162b2 cohort and 129 unvaccinated), and were eligible to complete the absenteeism,  
261 presenteeism and work-productivity loss questions. At Week 1, COVID-19 had a large impact on  
262 all four WPAI-GH domains for both the unvaccinated and BNT162b2 cohort. The mean time loss  
263 due to absenteeism was, respectively, 65.0% and 45.6%; the mean time loss due to presenteeism  
264 was, respectively, 46.8% and 38.4%; the mean time of work productivity loss was 65.0% and  
265 53.8%, and the mean time of activity impairment was 50.2% and 43.9%. All within-cohort ESs  
266 were  $> 0.8$ , which are considered large effects (Table 3). After controlling for pre-COVID-19  
267 baseline score, and other covariates, the BNT162b2 cohort was associated with less worsening in  
268 WPAI-GH scores. Small-to-medium ESs were observed for work-related scores (absenteeism -  
269 0.50, presenteeism -0.26, and work productivity loss -0.32) between the BNT162b2 cohort and  
270 the unvaccinated cohort (Table 4). At Week 4, the mean time loss dropped across all four  
271 domains. The time loss due to absenteeism dropped substantially; the change from baseline in  
272 absenteeism was not found to be statistically significant between the BNT162b2 cohort and the  
273 unvaccinated cohort. Small-to-medium ESs were observed for presenteeism (-0.38) work  
274 productivity loss (-0.29), and activity impairment (-0.34) between the BNT162b2 cohort and the  
275 unvaccinated cohort (Table 4, Supplemental Figure 3 and 4).

276

## 277 **DISCUSSION**

278 The impacts of SARS-CoV-2 infection go beyond its clinical outcomes.

279 We found that mild acute infection can negatively impact the humanistic outcomes for up to four  
280 weeks post infection. Shortly after infection, the UI and EQ-VAS HRQoL scores dropped from  
281 pre-COVID, and over half of the study population reported problems in usual activities,

282 pain/discomfort and anxiety/depression. At Week 1, the work productivity and activity  
283 impairment time loss were over 50%. At Week 4, both the HRQoL and WPAI scores improved,  
284 although they did not return to pre-COVID levels. Individuals vaccinated with BNT162b2 were  
285 less impacted and recovered faster than unvaccinated individuals. Multivariable analyses showed  
286 that BNT162b2 was significantly associated with higher EQ-VAS and UI scores, less symptoms  
287 and better WPAI scores, except for absenteeism at Week 4.

288 There is limited evidence measuring the health-related wellbeing of non-hospitalized individuals  
289 affected by COVID-19 [1-4]. To our knowledge, this is the first report measuring the impact of  
290 COVID-19 on the HRQoL and WPAI among a national sample of outpatients in the United  
291 States. In contrast to our study, previous research that used EQ-5D scales to measure COVID-19  
292 impact on the HRQoL reported mean UI scores ranging from 0.61 to 0.86 depending on the  
293 hospitalization treatment and time since discharge [1, 2]. The EQ-VAS scores ranged from 50.7  
294 to 70.3 [1, 2]. In our study, the HRQoL scores at Day 3 and Week 4 among outpatients with mild  
295 disease are higher than those, likely due to the different study populations and periods. In a small  
296 US study assessing the impact of COVID-19 on WPAI ~4 months post-infection among subjects  
297 enrolled in clinical trials before the introduction of vaccines, 46% of the non-hospitalized  
298 patients reported health-related impairment in daily activities [24]. Among the employed, 11.5%  
299 missed work and 38.9% reported impairment at work due to health. In our study, all the WPAI  
300 scores among unvaccinated at Week 1 are higher, and those at Week 4 similar or lower than  
301 those, likely due to the different cut-off, study populations, periods and design.

302 HRQoL and WPAI studies are scarce in COVID-19 related vaccination research. To our  
303 knowledge, this is the first report on the effects of BNT162b2 on these patient-centric outcomes.

304 These results indicate an additive benefit beyond vaccine effectiveness that should be explored  
305 further.

306 Strengths of this study include the nationally representative real-world source population of  
307 mildly symptomatic outpatients, the prospective collection of the primary outcomes via validated  
308 instruments, and the representativeness of the employed population for work productivity  
309 analyses (~65% of the cohort). The age distribution of study participants was comparable with  
310 the non-enrolled tested population ( $p=0.076$  for mean age, Supplemental Table 1) and with CDC  
311 research in non-hospitalized adults: 91.6% were between 18 and 64 and 8.4% were 65 or older,  
312 which was quite similar to Hernandez-Romieu [25], 92.7% and 7.3%, respectively. In the  
313 vaccinated group, the time between vaccination and breakthrough infection (mean: ~6 months)  
314 was consistent with literature on vaccine-induced duration of protection [5].

315 The study findings are subject to limitations. All the data analyzed was self-reported and may be  
316 subject to error, missingness, recall bias, social desirability bias, and selection bias associated  
317 with survey drop-out. Out of 430 participants completing Day 3 survey, 12% (51/430) missed  
318 Week 1 and 23% (99/430) missed Week 4 survey. The drop in responses may partly be the result  
319 of responders' fatigue, and/or recovered cases not returning to follow-up surveys. Female and  
320 older age ( $\geq 30$  years) were found to be more likely to miss follow-up surveys. However, after  
321 taking into account several variables, the model predicting missingness indicated that  
322 missingness was not associated with vaccination status, nor with HRQoL in terms of EQ VAS on  
323 Day 3 and its change from pre-COVID-19 baseline (

324 Supplemental Table 4).

325 The study population differed from non-enrolled tested outpatients in being predominantly  
326 female, white, with a higher vaccination uptake, and slightly more comorbidities (Supplemental  
327 Table 1). The female over-representation is in line with prior research indicating that women are  
328 more likely to contribute to health research surveys [2]. In our study, ~24% of participants  
329 reported at least one comorbidity, in contrast to 20% among the non-enrolled tested and ~35% in  
330 Hernandez-Romieu (2021) [25]. Various models were fit to account for potential effects due to  
331 sociodemographic factors and comorbidities. These adjusted effect sizes between BNT162b2 and  
332 unvaccinated cohorts were similar and consistent with those calculated from observed data  
333 (unadjusted effect sizes).

334 The pre-COVID baseline scores were slightly higher than US population norms. The mean EQ-  
335 VAS and UI were 86.9 and 0.924 for the BNT162b2 cohort, and 87.8 and 0.918 for the  
336 unvaccinated cohort, respectively. Cha et al (2019) reported a mean EQ-VAS of 84.6 for the U.S.  
337 general population [12]. Jiang et al (2021) reported the US population norm of EQ-VAS as 80.4  
338 and the mean EQ-5D-5L UI as 0.851 [26]. The healthy pre-infection status of the study  
339 population and the potential for retrospective recall bias may partially explain the differences. A  
340 modified EQ-5D-5L questionnaire was used to retrospectively measure pre-COVID-19 baseline  
341 data; despite literature suggesting concordance between prospective and retrospective  
342 measurements of EQ-5D-5L [27, 28], and a good correlation between assessment of baseline  
343 before the index date and recall assessment of the baseline after index date, there is currently no  
344 information regarding the recall application of the EQ-5D-5L for COVID-related studies.

345 The pre-COVID-19 values for absenteeism and presenteeism were 3.1% and 9.5% in the  
346 BNT162b2 cohort, and were generally in line with Tundia et al (2015) [29], whom reported 4%



347 absenteeism and 10% presenteeism for the US general population. The reported values were  
348 slightly higher among unvaccinated, respectively 11.7% and 9.4%.

349  
350 There is currently no standard definition of minimal clinically important difference of PROs in  
351 COVID-19 research. We used effect size (ES) of Cohen's  $d$  to quantify the magnitude of score  
352 change from baseline within the BNT162b2 vaccinated cohort and the unvaccinated cohort, as  
353 well the difference between these two cohorts [20]. An effect size ES of 0 between groups  
354 indicates that the average (typical) treated vaccinated person has a score that is no different from  
355 the typical control person; equivalently, scores of the typical treated person are more favorable  
356 than 50% of the individual scores in the control group, meaning no incremental benefit (a coin  
357 toss as to which intervention is better). If the vaccinated cohort is presumed more effective than  
358 the unvaccinated cohort, effect sizes thresholds of 0.2, 0.3, 0.5, and 0.8 (in absolute value)  
359 indicate that, based on the standardized normal distribution, the score of the typical person in the  
360 vaccinated cohort is more favorable than 58% (8% incremental benefit), 62% (12% incremental  
361 benefit), 69% (19% incremental benefit), and 70% (29% increment benefit) of the scores from  
362 individuals in the unvaccinated cohort. For example, from baseline to Week 1, the increase in the  
363 absenteeism WPAI score of the typical person in the vaccinated cohort was less (more favorable)  
364 than the corresponding change in 69% of individuals in the unvaccinated group (effect size = -  
365 0.5). Depending on the type of outcome, the same type of effect size interpretation for between  
366 cohorts can be given within cohort. For instance, from baseline to Week 4, the quality of life EQ-  
367 VAS score of the typical person in the vaccine cohort at Week 4 was less (worse) than 59% of  
368 the individual scores in the vaccine cohort at baseline (effect size = -0.22); the quality of life EQ-

369 VAS score of the typical person in the unvaccinated cohort at Week 4 was less (worse) than 66%  
370 of the individual scores in the unvaccinated cohort at baseline (effect size = -0.42).

371

372 The study did not assess the impact on pediatrics, caregivers, long-term outcomes (e.g., “Long  
373 COVID”), and the data was collected during Omicron predominance in the US. Therefore, these  
374 findings may not be generalizable to prior or future variants, other countries, time periods and  
375 populations that were excluded. COVID-19 sequelae can affect a substantial portion of patients,  
376 with long-term consequences for their health, continuity of care and ability to work [1, 2].

377 Persistent symptoms and work impairment were reported ~4 months after infection among non-  
378 hospitalized US patients enrolled in clinical trials [24]. Continued follow-up studies covering  
379 longer time periods may inform whether the protection provided by COVID-19 vaccination  
380 extends beyond the acute phase. Only generic PROMs were used in this study; COVID-19  
381 disease-specific instruments are under development [30, 31], warranting research on their  
382 implementation. The PROMs omitted questions on vaccine adverse events. The mean 6-month  
383 interval between vaccination and breakthrough infection and a medical review ruled out cases of  
384 residual symptoms from vaccination. Research on the impact of vaccine adverse events on  
385 HRQoL is warranted.

386 Lastly, the study adopted an observational design, which is limited in establishing causal  
387 relationships. Future studies using different data collection methods could corroborate the study  
388 findings, including those with more rigorous study design.

389 Consistent with literature, our study found that COVID-19 is detrimental to mildly symptomatic  
390 COVID-19 patients. The findings provide a meaningful contribution suggesting that the ability

391 of BNT162b2 to reduce adverse outcomes from COVID-19 disease can translate to lessening the  
392 broad impact of COVID-19 and improvements in quality of life, work productivity and activity.

393

## 394 **CONCLUSION**

395 This study found that mild COVID-19 infection at a time of Omicron predominance adversely  
396 impacted the HRQoL, daily activity and work productivity of patients. This detrimental effect  
397 improved over time, although it persisted for at least one month post infection. Compared with  
398 unvaccinated, those vaccinated with BNT162b2 were less impacted and recovered faster. These  
399 findings advance research on COVID-19 associated humanistic outcomes and the potential effect  
400 of BNT162b2 in lessening the loss of HRQoL, daily activity and work productivity due to  
401 COVID-19. The results can inform the estimation of quality-adjusted life years and indirect cost  
402 savings in health economic studies.

403

## 404 **List of Abbreviations**

405 CDC: Centers for Disease Control and Prevention; CI: Confidence interval; EQ-5D-5L:  
406 EuroQoL Group 5 dimension and 5 level questionnaire; ES: Effect size; GH: General Health;  
407 HRQoL: Health Related Quality of Life; MMRM: Mixed models for repeated measures; SD:  
408 standard deviation; SE: standard error; STROBE: the Strengthening the Reporting of  
409 Observational Studies in Epidemiology; UI: utility index; VAS: Visual analogue scale; WPAI:  
410 Work Productivity and Impairment.

411

## 412 **DECLARATIONS:**

413 **Ethics Approval and consent to participate**

414 This study was approved by the Sterling IRB, Protocol #C4591034. Participation in the study  
415 was voluntary and anonymous. Consent was obtained electronically via the CVS Health E-  
416 Consent platform. Participants were informed of their right to refuse or withdraw from the study  
417 at any time. Participants were compensated for their time.

#### 418 **Consent for publication**

419 All authors have given their approval for this manuscript version to be published.

#### 420 **Availability of data and material**

421 Aggregated data that support the findings of this study are available upon reasonable request  
422 from the corresponding author MDF, subject to review. These data are not publicly available due  
423 to them containing information that could compromise research participant privacy/consent.

#### 424 **Competing interests**

425 MDF, MMM, JMZ, LP, MBA and JCC are employees of Pfizer and may hold stock or stock  
426 options of Pfizer. XS and HC are employees of CVS Health and may hold stock of CVS health.  
427 YPT was employee of CVS Health when current study was conducted.

#### 428 **Funding**

429 This study was sponsored by Pfizer Inc.

#### 430 **Authors' contributions**

431 All named authors meet the International Committee of Medical Journal Editors (ICMJE) criteria  
432 for authorship for this article. All authors contributed to study conception and design, data  
433 acquisition, analysis, and interpretation, drafting and revising of the manuscript.

#### 434 **Acknowledgements**

435 The authors acknowledge Alejandro Cane, Deepa Malhotra and Nancy Gifford (Pfizer  
436 employees), Joseph Ferenchick, Shiyu Lin and Shawn Edmonds (CVS Health employees) for

437 specific contributions to this research project. Editorial support was provided by Laura Anatale-  
438 Tardiff and Leena Samuel at CVS Health and was funded by Pfizer.

439

## 440 REFERENCES

- 441 1. Poudel AN, Zhu S, Cooper N, Roderick P, Alwan N, Tarrant C, Ziauddeen N, Yao GL  
442 (2021) Impact of Covid-19 on health-related quality of life of patients: A structured  
443 review. *PLoS One*. 16(10):e0259164.
- 444 2. Nandasena H, Pathirathna M, Atapattu A, Prasanga P (2022) Quality of life of COVID 19  
445 patients after discharge: Systematic review. *PloS one*. 17(2):e0263941.
- 446 3. Figueiredo EAB, Silva WT, Tsopanoglou SP, Vitorino DFdM, Oliveira LFLd, Silva  
447 KLS, Luz HDH, Ávila MR, Oliveira LFFd, Lacerda ACR (2022) The health-related  
448 quality of life in patients with post-COVID-19 after hospitalization: a systematic review.  
449 *Revista da Sociedade Brasileira de Medicina Tropical*. 55.
- 450 4. Amdal CD, Pe M, Falk RS, Piccinin C, Bottomley A, Arraras JI, Darlington AS, Hofso  
451 K, Holzner B, Jørgensen NMH (2021) Health-related quality of life issues, including  
452 symptoms, in patients with active COVID-19 or post COVID-19; a systematic literature  
453 review. *Quality of Life Research*. 30(12):3367-81.
- 454 5. International Vaccine Access Center, Johns Hopkins Bloomberg School of Public Health,  
455 World Health Organization. Results of COVID-19 Vaccine Effectiveness & Impact  
456 Studies: An Ongoing Systematic Review. [https://view-hub.org/sites/default/files/2022-  
457 04/COVID19\\_VE\\_and\\_Impact\\_Lit\\_Review\\_Methods.pdf](https://view-hub.org/sites/default/files/2022-04/COVID19_VE_and_Impact_Lit_Review_Methods.pdf) Accessed August 15, 2022.
- 458 6. Arab-Zozani M, Hashemi F, Safari H, Yousefi M, Ameri H (2020) Health-related quality  
459 of life and its associated factors in COVID-19 patients. *Osong public health and research  
460 perspectives*. 11(5):296.
- 461 7. Petersen EL, Goßling A, Adam G, Aepfelbacher M, Behrendt C-A, Cavus E, Cheng B,  
462 Fischer N, Gallinat J, Kühn S (2022) Multi-organ assessment in mainly non-hospitalized  
463 individuals after SARS-CoV-2 infection: the Hamburg City Health Study COVID  
464 programme. *European Heart Journal*. 43(11):1124-37.
- 465 8. McKay SC, Lembach H, Hann A, Okoth K, Anderton J, Nirantharakumar K, Magill L,  
466 Torlinska B, Armstrong M, Mascaro J (2021) Health - related quality of life, uncertainty  
467 and coping strategies in solid organ transplant recipients during shielding for the  
468 COVID - 19 pandemic. *Transplant International*. 34(11):2122-37.
- 469 9. Talman S, Boonman-de Winter L, De Mol M, Hoefman E, Van Etten R, De Backer I  
470 (2021) Pulmonary function and health-related quality of life after COVID-19 pneumonia.  
471 *Respiratory Medicine*. 176:106272.
- 472 10. Centers for Disease Control and Prevention. Updates - Symptoms of COVID-19.  
473 <https://www.cdc.gov/coronavirus/2019-ncov/symptoms-testing/symptoms.html> Accessed  
474 August 1 2021.
- 475 11. EuroQol Research Foundation. (2019) EQ-5D-5L User Guide, Version 3.0.  
476 <https://euroqol.org/publications/user-guides> Accessed August 5, 2021.

- 477 12. Cha AS, Law EH, Shaw JW, Pickard AS (2019) A comparison of self-rated health using  
478 EQ-5D VAS in the United States in 2002 and 2017. *Quality of Life Research*.  
479 28(11):3065-9.
- 480 13. Pickard AS, Law EH, Jiang R, Pullenayegum E, Shaw JW, Xie F, Oppe M, Boye KS,  
481 Chapman RH, Gong CL (2019) United States valuation of EQ-5D-5L health states using  
482 an international protocol. *Value in Health*. 22(8):931-41.
- 483 14. Reilly MC, Zbrozek AS, Dukes EM (1993) The validity and reproducibility of a work  
484 productivity and activity impairment instrument. *Pharmacoeconomics*. 4(5):353-65.
- 485 15. Reilly Associates. (2002) WPAI Scoring.  
486 [http://www.reillyassociates.net/WPAI\\_Scoring.html](http://www.reillyassociates.net/WPAI_Scoring.html) Accessed August 5, 2021.
- 487 16. Centers for Disease Control and Prevention. Long COVID or Post-COVID Conditions.  
488 <https://www.cdc.gov/coronavirus/2019-ncov/long-term-effects/index.html> Accessed  
489 August 15, 2022.
- 490 17. Rosner B (2015) *Fundamentals of biostatistics*. Eighth ed. Cengage learning, Boston, MA
- 491 18. Freeman G, Halton JH (1951) Note on an exact treatment of contingency, goodness of fit  
492 and other problems of significance. *Biometrika*. 38(1/2):141-9.
- 493 19. Fitzmaurice GM, Laird NM, Ware JH (2012) *Applied longitudinal analysis*. John Wiley  
494 & Sons, Hoboken, NJ
- 495 20. Cohen J (1988) *Statistical power analysis for the behavioral sciences*. 2nd ed. Lawrence  
496 Erlbaum Assoc, Hillsdale, NJ.
- 497 21. McLeod LD, Cappelleri JC, Hays RD (2016) Best (but oft-forgotten) practices:  
498 expressing and interpreting associations and effect sizes in clinical outcome assessments.  
499 *The American journal of clinical nutrition*. 103(3):685-93. Erratum:  
500 <https://doi.org/10.3945/ajcn.116.148593>.
- 501 22. Mouelhi Y, Jouve E, Castelli C, Gentile S (2020) How is the minimal clinically important  
502 difference established in health-related quality of life instruments? Review of anchors  
503 and methods. *Health and Quality of Life Outcomes*. 18(1):1-17.
- 504 23. STROBE Statement—Checklist of items that should be included in reports of cohort  
505 studies. <https://www.strobe-statement.org/download/strobe-checklist-cohort-studies-pdf>  
506 Accessed August 5, 2022.
- 507 24. Jacobson KB, Rao M, Bonilla H, Subramanian A, Hack I, Madrigal M, Singh U,  
508 Jagannathan P, Grant P (2021) Patients with uncomplicated COVID-19 have long-term  
509 persistent symptoms and functional impairment similar to patients with severe COVID-  
510 19: a cautionary tale during a global pandemic. *Clinical Infectious Diseases*.  
511 10.1093/cid/ciab103.
- 512 25. Hernandez-Romieu AC, Leung S, Mbanya A, Jackson BR, Cope JR, Bushman D, Dixon  
513 M, Brown J, McLeod T, Saydah S (2021) Health care utilization and clinical  
514 characteristics of nonhospitalized adults in an integrated health care system 28–180 days  
515 after COVID-19 diagnosis—Georgia, May 2020–March 2021. *Morbidity and Mortality*  
516 *Weekly Report*. 70(17):644.
- 517 26. Jiang R, Janssen M, Pickard AS (2021) US population norms for the EQ-5D-5L and  
518 comparison of norms from face-to-face and online samples. *Quality of Life Research*.  
519 30(3):803-16.
- 520 27. Lawson A, Tan AC, Naylor J, Harris IA (2020) Is retrospective assessment of health-  
521 related quality of life valid? *BMC Musculoskeletal Disorders*. 21(1):1-10.

- 522 28. Rajan SS, Wang M, Singh N, Jacob AP, Parker SA, Czap AL, Bowry R, Grotta JC,  
523 Yamal JM (2021) Retrospectively Collected EQ-5D-5L Data as Valid Proxies for  
524 Imputing Missing Information in Longitudinal Studies. *Value Health*. 24(12):1720-7.  
525 10.1016/j.jval.2021.07.007.
- 526 29. Tundia N, Hass S, Fuldeore M, Wang LL, Cavanaugh T, Boone J, Heaton P (2015)  
527 Validation and US population norms of health-related productivity questionnaire. *Value*  
528 *in Health*. 18(3):A24.
- 529 30. Romano C, Fehnel S, Stoddard J, Sadoff J, Lewis S, McNulty P, Chan EK, Evans E,  
530 Jamieson C, Slagle AF (2022) Development of a novel patient-reported outcome measure  
531 to assess signs and symptoms of COVID-19. *Journal of Patient-Reported Outcomes*.  
532 6(1):1-12.
- 533 31. Hughes SE, Haroon S, Subramanian A, McMullan C, Aiyegbusi OL, Turner GM,  
534 Jackson L, Davies EH, Frost C, McNamara G (2022) Development and validation of the  
535 symptom burden questionnaire for long covid (SBQ-LC): Rasch analysis. *BMJ*. 377.  
536

537 **Figure 1. Study design** <sup>a</sup>

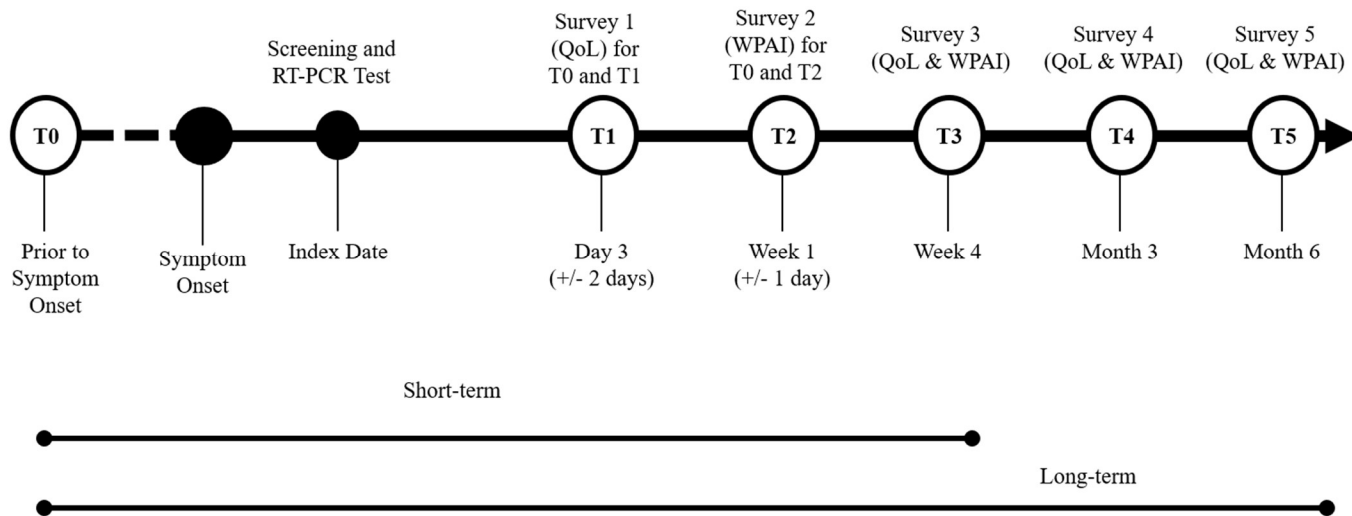

538

539 <sup>a</sup> QoL refers to the EQ-5D-5L survey

540



541 **Figure 2.** Study flow diagram

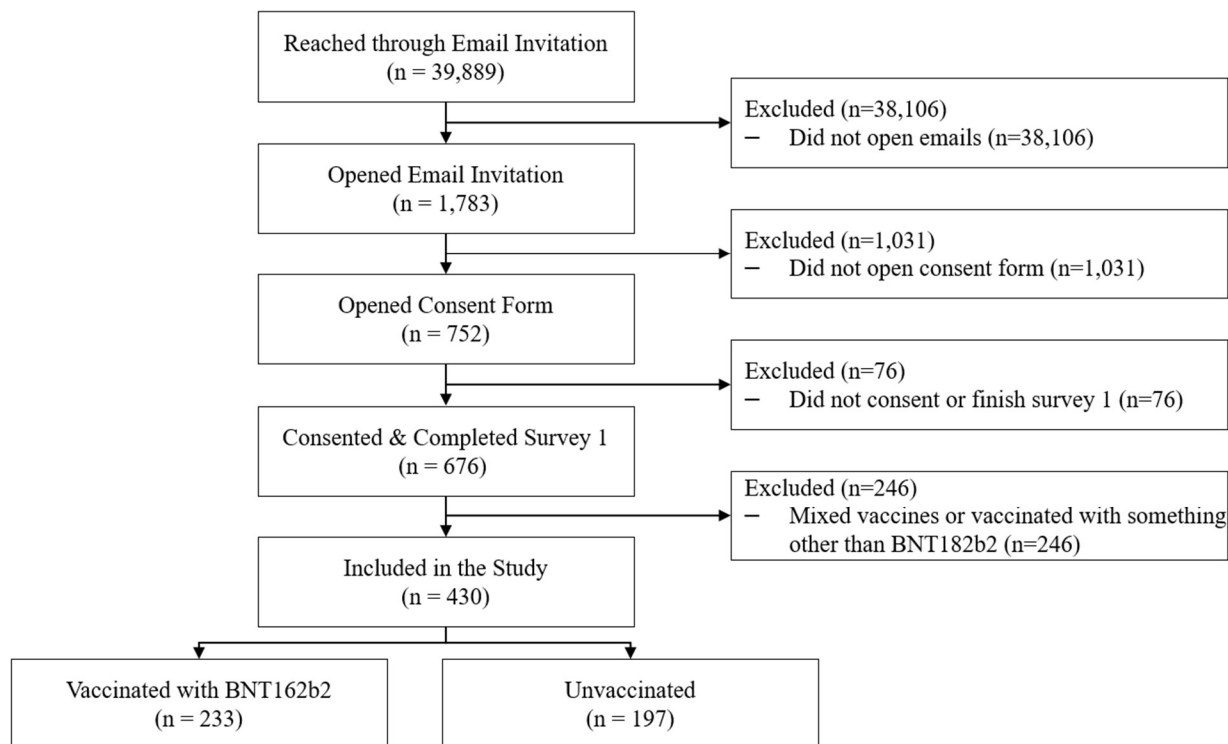

542  
543

544 **Table 1** Patient Characteristics on Index Day

|                                             | All         | BNT162b2    | Unvaccinated | P-value <sup>a</sup> |
|---------------------------------------------|-------------|-------------|--------------|----------------------|
| Total, n                                    | 430         | 233         | 197          |                      |
| Age, years                                  |             |             |              |                      |
| Mean, SD                                    | 42.4 (14.3) | 43.7 (15.3) | 40.9 (12.9)  | 0.049                |
| 18-29                                       | 87 (20.2%)  | 49 (21.0%)  | 38 (19.3%)   | 0.011                |
| 30-49                                       | 213 (49.5%) | 100 (42.9%) | 113 (57.4%)  |                      |
| 50-64                                       | 94 (21.9%)  | 60 (25.8%)  | 34 (17.3%)   |                      |
| ≥65                                         | 36 (8.4%)   | 24 (10.3%)  | 12 (6.1%)    |                      |
| Gender                                      |             |             |              | 0.966                |
| Female                                      | 327 (76.0%) | 177 (76.0%) | 150 (76.1%)  |                      |
| Male                                        | 103 (24.0%) | 56 (24.0%)  | 47 (23.9%)   |                      |
| Race / Ethnicity                            |             |             |              | 0.026                |
| White or Caucasian (not Hispanic or Latino) | 295 (68.6%) | 166 (71.2%) | 129 (65.5%)  |                      |
| Black or African American                   | 20 (4.7%)   | 7 (3.0%)    | 13 (6.6%)    |                      |
| Hispanic                                    | 61 (14.2%)  | 35 (15.0%)  | 26 (13.2%)   |                      |
| Asian                                       | 22 (5.1%)   | 15 (6.4%)   | 7 (3.6%)     |                      |
| Patient Refused                             | 13 (3.0%)   | 5 (2.2%)    | 8 (4.1%)     |                      |
| Other                                       | 19 (4.4%)   | 5 (2.2%)    | 14 (7.1%)    |                      |
| CMS Geographic Region (n, %)                |             |             |              | 0.009                |
| Region 1: ME, NH, VT, MA, CT, RI            | 19 (4.4%)   | 10 (4.3%)   | 9 (4.6%)     |                      |
| Region 2: NY, NJ, PR, VI                    | 11 (2.6%)   | 7 (3.0%)    | 4 (2.0%)     |                      |
| Region 3: PA, DE, MD, DC, WV, VA            | 37 (8.6%)   | 22 (9.4%)   | 15 (7.6%)    |                      |
| Region 4: KY, TN, NC, SC, GA, MS, AL, FL    | 156 (36.3%) | 81 (34.8%)  | 75 (38.1%)   |                      |
| Region 5: MN, WI, IL, MI, IN, OH            | 58 (13.5%)  | 31 (13.3%)  | 27 (13.7%)   |                      |
| Region 6: NM, OK, AR, TX, LA                | 82 (19.1%)  | 56 (24.0%)  | 26 (13.2%)   |                      |
| Region 7: NE, IA, KS, MO                    | 19 (4.4%)   | 11 (4.7%)   | 8 (4.1%)     |                      |
| Region 8 : MT, ND, SD, WY, UT, CO           | 1 (0.2%)    | 1 (0.4%)    | 0 (0.0%)     |                      |
| Region 9: CA, NV, AZ, GU                    | 46 (10.7%)  | 13 (5.6%)   | 33 (16.8%)   |                      |
| Region 10: AK, WA, OR, ID                   | 1 (0.2%)    | 1 (0.4%)    | 0 (0.0%)     |                      |
| U.S. Geographic Region                      |             |             |              | 0.005                |
| Northeast                                   | 53 (12.2%)  | 29 (12.3%)  | 24 (12.2%)   |                      |
| South                                       | 254 (58.7%) | 150 (63.6%) | 104 (52.8%)  |                      |
| Midwest                                     | 77 (17.8%)  | 42 (17.8%)  | 35 (17.8%)   |                      |
| West                                        | 49 (11.3%)  | 15 (6.4%)   | 34 (17.3%)   |                      |
| Previously Tested Positive                  | 167 (38.8%) | 89 (38.2%)  | 78 (39.6%)   | 0.589                |

|                                                                     | All               | BNT162b2          | Unvaccinated      | P-value <sup>a</sup> |
|---------------------------------------------------------------------|-------------------|-------------------|-------------------|----------------------|
| Work in healthcare                                                  | 47 (10.9%)        | 29 (12.4%)        | 18 (9.1%)         | 0.309                |
| Work in high-risk setting                                           | 44 (10.2%)        | 30 (12.9%)        | 14 (7.1%)         | 0.158                |
| Live in high-risk setting                                           | 22 (5.1%)         | 12 (5.2%)         | 10 (5.1%)         | 0.553                |
| Social vulnerability index                                          |                   |                   |                   |                      |
| Mean (SD)                                                           | 0.44 (0.22)       | 0.40 (0.22)       | 0.49 (0.21)       | <0.001               |
| Median (Q1, Q3)                                                     | 0.41 (0.27, 0.59) | 0.37 (0.23, 0.55) | 0.47 (0.31, 0.63) | <0.001               |
| Self-Reported Comorbidity                                           |                   |                   |                   |                      |
| Asthma or Chronic Lung Disease                                      | 34 (7.9%)         | 21 (9.0%)         | 13 (6.6%)         | 0.355                |
| Cirrhosis of the liver                                              | 1 (0.2%)          | 1 (0.4%)          | 0 (0.0%)          | 1.0000               |
| Immunocompromised Conditions or Weakened Immune System <sup>c</sup> | 19 (4.4%)         | 12 (5.2%)         | 7 (3.6%)          | 0.422                |
| Diabetes                                                            | 20 (4.7%)         | 13 (5.6%)         | 7 (3.6%)          | 0.320                |
| Heart Conditions or Hypertension                                    | 52 (12.1%)        | 30 (12.9%)        | 22 (11.2%)        | 0.588                |
| Overweight or obesity                                               | 19 (4.4%)         | 12 (5.2%)         | 7 (3.6%)          | 0.422                |
| At least 1 comorbidity                                              | 104 (24.2%)       | 61 (26.2%)        | 43 (21.8%)        | 0.294                |
| Number of comorbidities, Mean (SD)                                  | 0.34 (0.68)       | 0.38 (0.75)       | 0.28 (0.58)       | 0.138                |
| Index day <sup>b</sup> acute COVID-19 symptoms                      |                   |                   |                   |                      |
| Systemic symptoms                                                   |                   |                   |                   |                      |
| Fever                                                               | 164 (38.1%)       | 71 (30.5%)        | 93 (47.2%)        | <0.001               |
| Chills                                                              | 213 (49.5%)       | 100 (42.9%)       | 113 (57.4%)       | 0.003                |
| Muscle or Body Aches                                                | 232 (54.0%)       | 115 (49.4%)       | 117 (59.4%)       | 0.038                |
| Headache                                                            | 293 (68.1%)       | 153 (65.7%)       | 140 (71.1%)       | 0.231                |
| Fatigue                                                             | 266 (61.9%)       | 141 (60.5%)       | 125 (63.5%)       | 0.532                |
| Respiratory symptoms                                                |                   |                   |                   |                      |
| Shortness of Breath or Difficulty Breathing                         | 54 (12.6%)        | 25 (10.7%)        | 29 (14.7%)        | 0.213                |
| Cough                                                               | 309 (71.9%)       | 168 (72.1%)       | 141 (71.6%)       | 0.903                |
| Sore Throat                                                         | 238 (55.3%)       | 134 (57.5%)       | 104 (52.8%)       | 0.327                |
| New/Recent Loss of Taste or Smell                                   | 45 (10.5%)        | 23 (9.9%)         | 22 (11.2%)        | 0.662                |
| Congestion or Runny Nose                                            | 322 (74.9%)       | 188 (80.7%)       | 134 (68.0%)       | 0.003                |
| GI symptoms                                                         |                   |                   |                   |                      |
| Nausea or Vomiting                                                  | 55 (12.8%)        | 24 (10.3%)        | 31 (15.7%)        | 0.093                |
| Diarrhea                                                            | 88 (20.5%)        | 37 (15.9%)        | 51 (25.9%)        | 0.010                |
| Number of acute COVID-19 symptoms, Mean (SD)                        | 5.3 (2.6)         | 5.1 (2.4)         | 5.6 (2.7)         | 0.034                |

545 <sup>a</sup> P value refers to the comparison between BNT162B2 and Unvaccinated.

546 <sup>b</sup> COVID-19 test nasal swab day

547 <sup>c</sup> Immunocompromised conditions includes compromised immune system (such as from  
548 immuno-compromising drugs, solid organ or blood stem cell transplant, HIV, or other  
549 conditions), conditions that result in a weakened immune system, including cancer treatment,  
550 and kidney failure or end stage renal disease

551 **Table 2** Post-COVID-19 Symptoms at Week 4

| Symptom                                                                     | All         | BNT162b2   | Unvaccinated | P-value <sup>a</sup> |
|-----------------------------------------------------------------------------|-------------|------------|--------------|----------------------|
| <b>General symptoms</b>                                                     |             |            |              |                      |
| Tiredness or fatigue                                                        | 136 (41.2%) | 71 (40.6%) | 65 (41.9%)   | 0.802                |
| Symptoms that get worse after physical or mental activities                 | 50 (15.2%)  | 18 (10.3%) | 32 (20.6%)   | 0.009                |
| Fever                                                                       | 1 (0.3%)    | 0 (0.0%)   | 1 (0.7%)     | 0.470                |
| General pain/discomfort                                                     | 50 (15.2%)  | 20 (11.4%) | 30 (19.4%)   | 0.045                |
| <b>Respiratory and cardiac</b>                                              |             |            |              |                      |
| Difficulty breathing or shortness of breath                                 | 58 (17.6%)  | 26 (14.9%) | 32 (20.6%)   | 0.168                |
| Cough                                                                       | 86 (26.1%)  | 40 (22.9%) | 46 (29.7%)   | 0.159                |
| Chest or stomach pain                                                       | 32 (9.7%)   | 14 (8.0%)  | 18 (11.6%)   | 0.268                |
| Fast-beating or pounding heart (also known as heart palpitations)           | 38 (11.5%)  | 17 (9.7%)  | 21 (13.5%)   | 0.276                |
| <b>Neurologic</b>                                                           |             |            |              |                      |
| Change in smell or taste                                                    | 51 (15.5%)  | 19 (10.9%) | 32 (20.6%)   | 0.014                |
| Headache                                                                    | 67 (20.3%)  | 28 (16.0%) | 39 (25.2%)   | 0.039                |
| Dizziness on standing (lightheadedness)                                     | 45 (13.6%)  | 20 (11.4%) | 25 (16.1%)   | 0.214                |
| Difficulty thinking or concentrating (sometimes referred to as “brain fog”) | 86 (26.1%)  | 43 (24.6%) | 43 (27.7%)   | 0.513                |
| Pins-and-needles feeling                                                    | 24 (7.3%)   | 10 (5.7%)  | 14 (9.0%)    | 0.247                |
| Sleep problems                                                              | 81 (24.5%)  | 35 (20.0%) | 46 (29.7%)   | 0.042                |
| Mood changes                                                                | 36 (10.9%)  | 13 (7.4%)  | 23 (14.8%)   | 0.031                |
| Memory loss                                                                 | 38 (11.5%)  | 11 (6.3%)  | 27 (17.4%)   | 0.002                |
| <b>Other</b>                                                                |             |            |              |                      |
| Diarrhea                                                                    | 23 (7.0%)   | 6 (3.4%)   | 17 (11.0%)   | 0.007                |
| Joint or muscle pain                                                        | 67 (20.3%)  | 29 (16.6%) | 38 (24.5%)   | 0.073                |
| Rash                                                                        | 11 (3.3%)   | 3 (1.7%)   | 8 (5.2%)     | 0.082                |
| Changes in period cycles                                                    | 28 (11.5%)  | 12 (9.4%)  | 16 (13.8%)   | 0.280                |
| Number of post-COVID-19 symptoms, Mean (SD)                                 | 3.1 (3.6)   | 2.5 (3.0)  | 3.7 (4.1)    | 0.002                |
| 0                                                                           | 100 (30.3%) | 54 (30.9%) | 46 (29.7%)   | 0.001                |
| 1-2                                                                         | 100 (30.3%) | 59 (33.7%) | 41 (26.5%)   |                      |
| 3-5                                                                         | 61 (18.5%)  | 40 (22.9%) | 21 (13.5%)   |                      |
| 6-8                                                                         | 32 (9.7%)   | 9 (5.1%)   | 23 (14.8%)   |                      |
| ≥9                                                                          | 37 (11.2%)  | 13 (7.4%)  | 24 (15.5%)   |                      |

552 <sup>a</sup> P-values of t-test for number of symptoms, chi-square or Fisher’s exact tests when any one cell  
 553 has an expected frequency less than 5 for individual symptoms and number of symptom  
 554 category comparing the BNT162b2 cohort and the unvaccinated cohort.

555 **Table 3** Summary of EQ-5D-5L and WPAI-GH Scores<sup>a</sup> and Their Changes from Baseline by Assessment Time  
 556

|                             | BNT162b2 Cohort |               |                                   |                |                      |                              | Unvaccinated Cohort |               |                      |                |                      |                              | Difference in Change from Baseline Between Cohorts |                      |                              |
|-----------------------------|-----------------|---------------|-----------------------------------|----------------|----------------------|------------------------------|---------------------|---------------|----------------------|----------------|----------------------|------------------------------|----------------------------------------------------|----------------------|------------------------------|
|                             | Score           |               | Change from Baseline <sup>b</sup> |                |                      |                              | Score               |               | Change from Baseline |                |                      |                              |                                                    |                      |                              |
|                             | n               | Mean (SD)     | n                                 | Mean (SD)      | P-value <sup>c</sup> | ES <sub>w</sub> <sup>d</sup> | n                   | Mean (SD)     | n                    | Mean (SD)      | P-value <sup>c</sup> | ES <sub>w</sub> <sup>d</sup> | Mean (SD)                                          | P-value <sup>e</sup> | ES <sub>o</sub> <sup>f</sup> |
| EQ-5D-5L                    |                 |               |                                   |                |                      |                              |                     |               |                      |                |                      |                              |                                                    |                      |                              |
| Visual analogue scale (VAS) |                 |               |                                   |                |                      |                              |                     |               |                      |                |                      |                              |                                                    |                      |                              |
| Baseline <sup>g</sup>       | 233             | 86.9 (10.7)   |                                   |                |                      |                              | 197                 | 87.8 (11.0)   |                      |                |                      |                              |                                                    | 0.414 <sup>h</sup>   |                              |
| Day 3                       | 233             | 73.9 (15.6)   | 233                               | -13.0 (12.5)   | <0.001               | -1.04                        | 194                 | 71.8 (19.6)   | 194                  | -16.1 (17.1)   | <0.001               | -0.94                        | 3.1 (14.8)                                         | 0.033                | 0.21                         |
| Week 4                      | 171             | 82.9 (13.8)   | 171                               | -3.7 (10.7)    | <0.001               | -0.35                        | 151                 | 80.9 (15.7)   | 151                  | -7.2 (13.7)    | <0.001               | -0.53                        | 3.5 (12.2)                                         | 0.011                | 0.28                         |
| Utility Index (US weight)   |                 |               |                                   |                |                      |                              |                     |               |                      |                |                      |                              |                                                    |                      |                              |
| Baseline <sup>e</sup>       | 233             | 0.924 (0.117) |                                   |                |                      |                              | 197                 | 0.918 (0.117) |                      |                |                      |                              |                                                    | 0.547 <sup>h</sup>   |                              |
| Day 3                       | 233             | 0.820 (0.193) | 233                               | -0.105 (0.159) | <0.001               | -0.66                        | 197                 | 0.762 (0.252) | 197                  | -0.155 (0.228) | <0.001               | -0.68                        | 0.050 (0.194)                                      | 0.007                | 0.26                         |
| Week 4                      | 176             | 0.882 (0.145) | 176                               | -0.039 (0.120) | <0.001               | -0.33                        | 155                 | 0.838 (0.197) | 155                  | -0.074 (0.156) | <0.001               | -0.47                        | 0.035 (0.138)                                      | 0.023                | 0.25                         |
| WPAI-GH                     |                 |               |                                   |                |                      |                              |                     |               |                      |                |                      |                              |                                                    |                      |                              |
| Absenteeism                 |                 |               |                                   |                |                      |                              |                     |               |                      |                |                      |                              |                                                    |                      |                              |
| Baseline <sup>e</sup>       | 153             | 2.8 (11.8)    |                                   |                |                      |                              | 129                 | 11.7 (26.4)   |                      |                |                      |                              |                                                    | <0.001 <sup>h</sup>  |                              |
| Week 1                      | 153             | 44.9 (38.3)   | 147                               | 42.5 (38.8)    | <0.001               | 1.09                         | 129                 | 66.7 (37.0)   | 127                  | 55.5 (39.2)    | <0.001               | 1.42                         | -13.0 (39.0)                                       | 0.006                | -0.33                        |
| Week 4                      | 128             | 4.6 (17.2)    | 122                               | 1.4 (20.1)     | 0.460                | 0.07                         | 106                 | 3.3 (12.2)    | 102                  | -7.7 (28.1)    | 0.007                | -0.27                        | 9.0 (24.1)                                         | 0.006                | 0.37                         |
| Presenteeism                |                 |               |                                   |                |                      |                              |                     |               |                      |                |                      |                              |                                                    |                      |                              |
| Baseline <sup>e</sup>       | 153             | 9.5 (18.5)    |                                   |                |                      |                              | 124                 | 9.4 (20.4)    |                      |                |                      |                              |                                                    | 0.958 <sup>h</sup>   |                              |
| Week 1                      | 123             | 41.7 (27.4)   | 119                               | 33.0 (29.1)    | <0.001               | 1.13                         | 82                  | 47.8 (34.2)   | 81                   | 38.2 (35.9)    | <0.001               | 1.06                         | -5.1 (32.1)                                        | 0.268                | -0.16                        |
| Week 4                      | 125             | 11.7 (18.8)   | 119                               | 1.4 (24.5)     | 0.527                | 0.06                         | 105                 | 18.7 (23.4)   | 96                   | 10.7 (24.1)    | <0.001               | 0.45                         | -9.3 (24.3)                                        | 0.006                | -0.38                        |
| Work productivity loss      |                 |               |                                   |                |                      |                              |                     |               |                      |                |                      |                              |                                                    |                      |                              |
| Baseline <sup>e</sup>       | 152             | 10.5 (20.0)   |                                   |                |                      |                              | 123                 | 14.2 (24.7)   |                      |                |                      |                              |                                                    | 0.175 <sup>h</sup>   |                              |
| Week 1                      | 123             | 56.6 (31.5)   | 118                               | 46.7 (34.5)    | <0.001               | 1.35                         | 82                  | 66.9 (32.4)   | 80                   | 53.2 (35.3)    | <0.001               | 1.51                         | -6.4 (34.9)                                        | 0.203                | -0.18                        |

|                       |     |             |     |             |        |      |     |             |     |             |        |      |             |                    |       |
|-----------------------|-----|-------------|-----|-------------|--------|------|-----|-------------|-----|-------------|--------|------|-------------|--------------------|-------|
| Week 4                | 125 | 12.9 (20.7) | 118 | 1.4 (27.5)  | 0.589  | 0.05 | 105 | 19.8 (24.6) | 96  | 7.7 (30.6)  | 0.016  | 0.25 | -6.3 (29.0) | 0.113              | -0.22 |
| Activity impairment   |     |             |     |             |        |      |     |             |     |             |        |      |             |                    |       |
| Baseline <sup>c</sup> | 203 | 12.5 (22.2) |     |             |        |      | 176 | 17.2 (27.2) |     |             |        |      |             | 0.065 <sup>h</sup> |       |
| Week 1                | 202 | 48.6 (29.8) | 202 | 36.1 (31.9) | <0.001 | 1.13 | 176 | 54.2 (32.7) | 176 | 37.0 (37.5) | <0.001 | 0.99 | -0.9 (34.6) | 0.801              | -0.03 |
| Week 4                | 175 | 15.5 (21.7) | 175 | 2.3 (26.3)  | 0.242  | 0.09 | 155 | 25.9 (28.5) | 155 | 8.8 (33.8)  | 0.002  | 0.26 | -6.4 (30.1) | 0.053              | -0.21 |

557 <sup>a</sup> Score ranges: EQ-5D-5L VAS 0 to 100, EQ-5D-5L UI (the United States weights) -0.573 to 1; WPAI-GH (absenteeism,  
558 presenteeism, work productivity loss, and activity impairment) 0 to 100 percent.

559 <sup>b</sup> Baseline refers to pre-COVID-19 symptom onset.

560 <sup>c</sup> P-value of t-test comparing mean score changes from baseline and 0 within BNT162b2 or Unvaccinated cohorts.

561 <sup>d</sup> ES<sub>w</sub> refers to effect size for score changes from baseline within BNT162b2 or Unvaccinated cohorts.

562 <sup>e</sup> P-value of t-test comparing mean score changes from baseline between BNT162b2 and Unvaccinated cohorts.

563 <sup>f</sup> ES<sub>b</sub> refers to effect size for score changes from baseline between BNT162b2 and Unvaccinated cohorts.

564 <sup>g</sup> Prior to symptom onset (pre-COVID).

565 <sup>h</sup> P-values of t-tests comparing pre-COVID-19 baseline mean scores between BNT162b2 and Unvaccinated cohorts.

566

567 **Table 4** Least-Square Mean Estimate and 95% Confidence Interval for EQ-5D-5L and WPAI-GH Scores <sup>a</sup>

| Variable                    | BNT162b2 Cohort            |                         |                      |                              | Unvaccinated Cohort         |                         |                      |                              | Between Cohort Difference |                      |                              |
|-----------------------------|----------------------------|-------------------------|----------------------|------------------------------|-----------------------------|-------------------------|----------------------|------------------------------|---------------------------|----------------------|------------------------------|
|                             | Score                      | Change from Baseline    |                      |                              | Score                       | Change from Baseline    |                      |                              |                           |                      |                              |
|                             | LSE (95% CI)               | LSE (95% CI)            | P-value <sup>b</sup> | ES <sub>w</sub> <sup>c</sup> | LSE (95% CI)                | LSE (95% CI)            | P-value <sup>b</sup> | ES <sub>w</sub> <sup>c</sup> | LSE (95% CI)              | P-value <sup>d</sup> | ES <sub>b</sub> <sup>e</sup> |
| EQ-5D-5L                    |                            |                         |                      |                              |                             |                         |                      |                              |                           |                      |                              |
| Visual analogue scale (VAS) |                            |                         |                      |                              |                             |                         |                      |                              |                           |                      |                              |
| Day 3                       | 76.2 (73.3, 79.2)          | -11.1 (-14.1, -8.2)     | <0.001               | -0.89                        | 72.6 (69.7, 75.4)           | -14.8 (-17.6, -11.9)    | <0.001               | -0.86                        | 3.6 (0.8, 6.5)            | 0.013                | 0.25                         |
| Week 4                      | 85.0 (82.1, 87.9)          | -2.3 (-5.2, 0.6)        | 0.119                | -0.22                        | 81.6 (78.8, 84.4)           | -5.7 (-8.5, -2.9)       | <0.001               | -0.42                        | 3.4 (0.6, 6.2)            | 0.016                | 0.28                         |
| Utility Index (US weight)   |                            |                         |                      |                              |                             |                         |                      |                              |                           |                      |                              |
| Day 3                       | 0.842 (0.805, 0.879)       | -0.077 (-0.115, -0.040) | <0.001               | -0.49                        | 0.773 (0.736, 0.809)        | -0.147 (-0.183, -0.110) | <0.001               | -0.64                        | 0.069 (0.032, 0.107)      | <0.001               | 0.36                         |
| Week 4                      | 0.903 (0.868, 0.938)       | -0.016 (-0.051, 0.019)  | 0.369                | -0.13                        | 0.859 (0.826, 0.892)        | -0.060 (-0.093, -0.027) | <0.001               | -0.38                        | 0.044 (0.013, 0.075)      | 0.005                | 0.32                         |
| WPAI-GH                     |                            |                         |                      |                              |                             |                         |                      |                              |                           |                      |                              |
| Absenteeism                 |                            |                         |                      |                              |                             |                         |                      |                              |                           |                      |                              |
| Week 1                      | 45.6 (38.0, 53.1)          | 39.1 (31.6, 46.7)       | <0.001               | 1.01                         | 65.0 (57.5, 72.5)           | 58.6 (51.1, 66.0)       | <0.001               | 1.49                         | -19.4 (-28.3, -10.6)      | <0.001               | -0.50                        |
| Week 4                      | 5.3 (0.0, 10.7)            | -1.1 (-6.5, 4.2)        | 0.676                | -0.06                        | 2.2 (0.0, 7.1) <sup>f</sup> | -4.3 (-9.2, 0.6)        | 0.086                | -0.15                        | 3.2 (-1.1, 7.4)           | 0.145                | 0.13                         |
| Presenteeism                |                            |                         |                      |                              |                             |                         |                      |                              |                           |                      |                              |
| Week 1                      | 38.4 (30.3, 46.5)          | 29.0 (20.8, 37.1)       | <0.001               | 1.00                         | 46.8 (38.6, 55.1)           | 37.4 (29.1, 45.6)       | <0.001               | 1.04                         | -8.4 (-16.7, -0.1)        | 0.047                | -0.26                        |
| Week 4                      | 6.8 (0, 13.9) <sup>f</sup> | -2.7 (-9.7, 4.4)        | 0.458                | -0.11                        | 16.0 (9.4, 22.5)            | 6.5 (0.0, 13.0)         | 0.050                | 0.27                         | -9.2 (-14.7, -3.6)        | 0.001                | -0.38                        |
| Work productivity loss      |                            |                         |                      |                              |                             |                         |                      |                              |                           |                      |                              |
| Week 1                      | 53.8 (45.1, 62.4)          | 42.4 (33.8, 51.0)       | <0.001               | 1.23                         | 65.0 (56.2, 73.7)           | 53.6 (44.8, 62.4)       | <0.001               | 1.52                         | -11.2 (-19.9, -2.5)       | 0.012                | -0.32                        |
| Week 4                      | 8.6 (0.9, 16.2)            | -2.8 (-10.4, 4.9)       | 0.476                | -0.10                        | 17.0 (9.9, 24.0)            | 5.7 (-1.4, 12.7)        | 0.116                | 0.18                         | -8.4 (-14.5, -2.3)        | 0.007                | -0.29                        |
| Activity impairment         |                            |                         |                      |                              |                             |                         |                      |                              |                           |                      |                              |
| Week 1                      | 43.9 (37.7, 50.1)          | 29.0 (22.8, 35.3)       | <0.001               | 0.91                         | 50.2 (44.2, 56.2)           | 35.4 (29.3, 41.4)       | <0.001               | 0.94                         | -6.3 (-12.4, -0.2)        | 0.044                | -0.18                        |



|        |                  |                  |       |       |                   |                 |       |      |                     |        |       |
|--------|------------------|------------------|-------|-------|-------------------|-----------------|-------|------|---------------------|--------|-------|
| Week 4 | 11.0 (5.1, 16.9) | -3.9 (-9.7, 2.0) | 0.194 | -0.15 | 21.3 (15.7, 26.9) | 6.4 (0.8, 12.0) | 0.025 | 0.19 | -10.3 (-15.6, -5.0) | <0.001 | -0.34 |
|--------|------------------|------------------|-------|-------|-------------------|-----------------|-------|------|---------------------|--------|-------|

568 Abbreviations: LSE = Least-Square Mean Estimate; CI = Confidence Interval.

569 <sup>a</sup> Multivariate models include variables for time, vaccination status and interaction of time by vaccination status, as well as covariates  
570 of participant pre-COVID-19 symptom onset score, sociodemographic characteristics (age, sex, regions, social vulnerability,  
571 race/ethnicity, high risk occupations), previously tested positive for COVID-19, severity of acute illness (number of symptoms  
572 reported on index date), and immunocompromised status. Parameter estimates are presented in Supplemental Table 3.

573 <sup>b</sup> P-value refers to the comparison of least-square mean estimates score changes from baseline and 0 within BNT162b2 or  
574 Unvaccinated cohorts

575 <sup>c</sup> ES<sub>w</sub>, within-cohort effect size, was calculated as the least square estimate of mean change from divided by the observed standard  
576 deviation of change scores from baseline to follow-up.

577 <sup>d</sup> ES<sub>b</sub>, between-cohort effect size, was calculated as the difference in least square estimates of mean changes from baseline between  
578 cohorts, divided by the observed pooled standard deviation of change scores

579 <sup>e</sup> P-value refers to the difference in least-square mean estimates between BNT162b2 and Unvaccinated cohorts.

580 <sup>f</sup> Lower limit of 95% CI was truncated from -2.7 to 0 for absenteeism and -0.3 to 0 for presenteeism at Week 4 because the valid range  
581 is 0 to 100.

582  
583  
584  
585  
586  
587  
588  
589  
590  
591  
592  
593  
594  
595  
596  
597  
598

599 **Figure 3** Mean Responses of EQ-5D-5L Dimensions by Timepoint

600

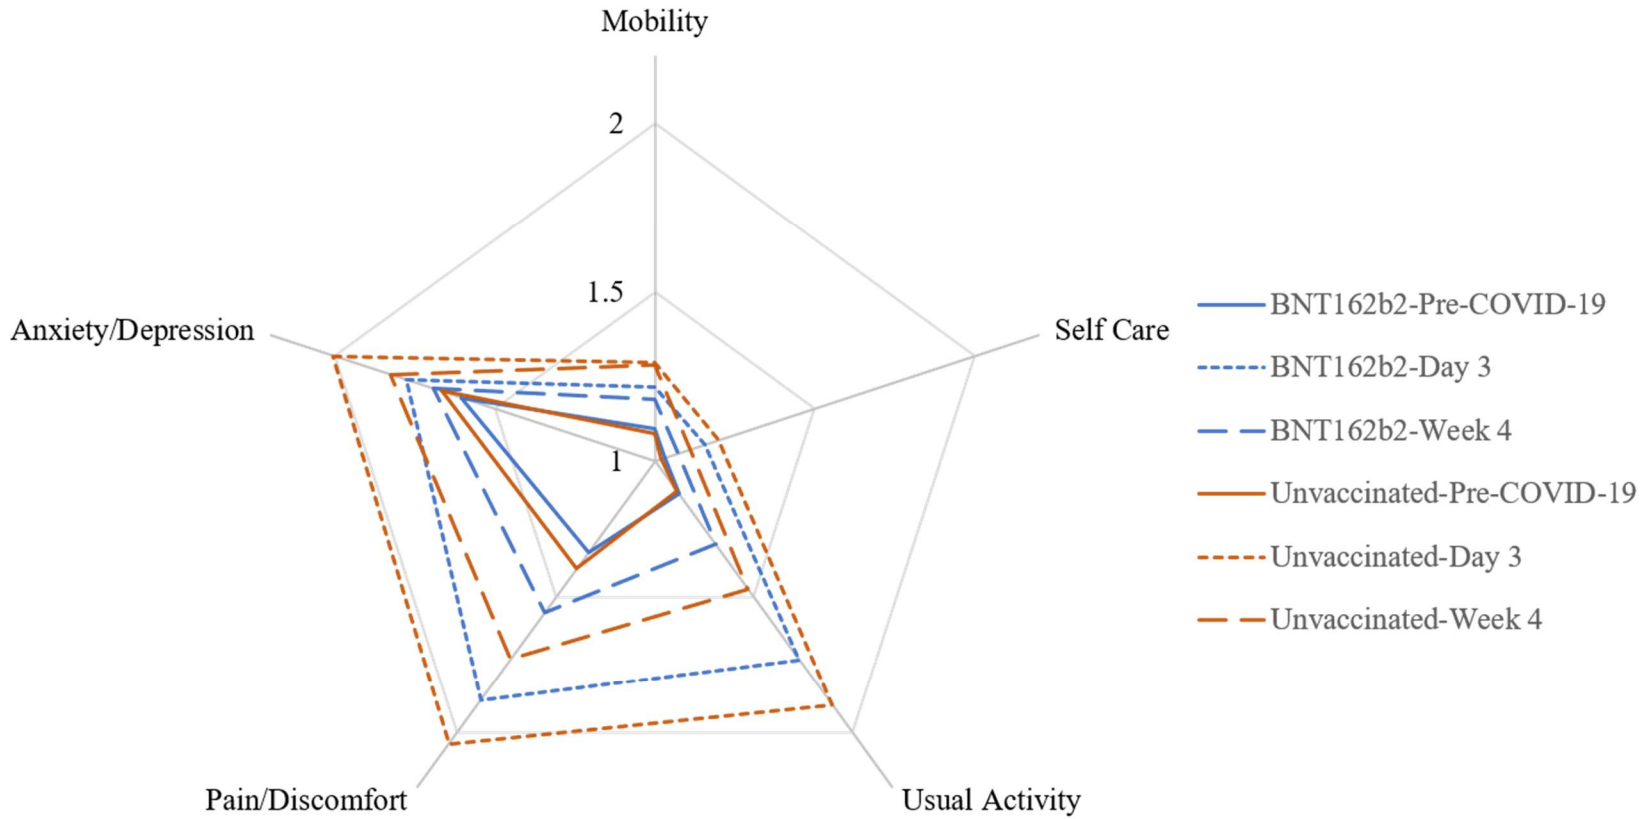

601

602

603 Mean dimension scores range from 1 for no problem to 5 for extreme / unable. The blue and red solid lines indicate that vaccinated  
604 and unvaccinated were similar at the pre-COVID baseline. At Day 3 and Week 4 post-index date, vaccinated cohort was less impacted  
605 (lower scores) than unvaccinated by COVID on anxiety/depression, pain/discomfort, and usual activities (dotted lines for Day 3,  
606 dashed lines for Week 4).

607

**Supplemental Table 1** Patient Characteristics by Enrollment Status

| Patient characteristics                      | Enrolled<br>N=676 | Not-Enrolled<br>N=39,213 | P value |
|----------------------------------------------|-------------------|--------------------------|---------|
| Vaccinated                                   |                   |                          | <0.001  |
| Yes                                          | 465 (68.8%)       | 22,125 (56.4%)           |         |
| No                                           | 211 (31.2%)       | 17,087 (43.6%)           |         |
| Missing                                      |                   |                          |         |
| Age, years                                   |                   |                          |         |
| Mean, SD                                     | 43.2 (14.7)       | 42.1 (15.5)              | 0.076   |
| Median, Q1, Q3                               | 41 (31--55)       | 40 (29--54)              | 0.010   |
| Age Category                                 |                   |                          |         |
| 18-29                                        | 134 (19.8%)       | 10,095 (25.7%)           | 0.005   |
| 30-49                                        | 317 (46.9%)       | 16,706 (42.6%)           |         |
| 50-64                                        | 156 (23.1%)       | 8,561 (21.8%)            |         |
| ≥65                                          | 69 (10.2%)        | 3,850 (9.8%)             |         |
| Gender, n (%)                                |                   |                          | <0.001  |
| Male                                         | 181 (26.8%)       | 17,843 (45.5%)           |         |
| Female                                       | 495 (73.2%)       | 21,370 (54.5%)           |         |
| Race / Ethnicity, n (%)                      |                   |                          | <0.001  |
| White or Caucasian (non-Hispanic or Latino)  | 486 (71.9%)       | 22,647 (57.8%)           |         |
| Black or African American                    | 32 (4.7%)         | 4,162 (10.6%)            |         |
| Hispanic or Latino                           | 85 (12.6%)        | 6,878 (17.5%)            |         |
| Asian                                        | 35 (5.2%)         | 2,551 (6.5%)             |         |
| Patient Refused                              | 16 (2.4%)         | 1,535 (3.9%)             |         |
| Other                                        | 22 (3.3%)         | 1,439 (3.7%)             |         |
| US Geographic Region                         |                   |                          | 0.258   |
| Northeast                                    | 92 (13.6%)        | 4,387 (11.2%)            |         |
| South                                        | 402 (59.5%)       | 24,305 (62.0%)           |         |
| Midwest                                      | 118 (17.5%)       | 6,414 (16.4%)            |         |
| West                                         | 64 (9.5%)         | 4,105 (10.5%)            |         |
| Number of acute COVID-19 symptoms, Mean (SD) | 5.2 (2.5)         | 5.1 (2.5)                | 0.732   |
| Number of comorbidities, Mean (SD)           | 0.3 (0.7)         | 0.3 (0.6)                | 0.021   |
| ≥1 comorbidity                               | 164 (24.3%)       | 7,677 (19.6%)            | 0.002   |

**Supplemental Table 2** Summary of EQ-5D-5L Dimensions

| Dimension             | All         | BNT162b2    | Unvaccinated | P-value <sup>a</sup> |
|-----------------------|-------------|-------------|--------------|----------------------|
| Pre-COVID-19 Baseline |             |             |              |                      |
| Mobility              |             |             |              | 0.841                |
| No problems           | 396 (92.1%) | 213 (91.4%) | 183 (92.9%)  |                      |
| Slight problems       | 30 (7.0%)   | 18 (7.7%)   | 12 (6.1%)    |                      |
| Moderate problems     | 4 (0.9%)    | 2 (0.9%)    | 2 (1.0%)     |                      |
| Severe problems       | 0 (0.0%)    | 0 (0.0%)    | 0 (0.0%)     |                      |
| Unable                | 0 (0.0%)    | 0 (0.0%)    | 0 (0.0%)     |                      |
| Missing               | 0 (0.0%)    | 0 (0.0%)    | 0 (0.0%)     |                      |
| Self-Care             |             |             |              | 0.560                |
| No problems           | 419 (97.4%) | 226 (97.0%) | 193 (98.0%)  |                      |
| Slight problems       | 11 (2.6%)   | 7 (3.0%)    | 4 (2.0%)     |                      |
| Moderate problems     | 0 (0.0%)    | 0 (0.0%)    | 0 (0.0%)     |                      |
| Severe problems       | 0 (0.0%)    | 0 (0.0%)    | 0 (0.0%)     |                      |
| Unable                | 0 (0.0%)    | 0 (0.0%)    | 0 (0.0%)     |                      |
| Missing               | 0 (0.0%)    | 0 (0.0%)    | 0 (0.0%)     |                      |
| Usual Activities      |             |             |              | 0.904                |
| No problems           | 394 (91.6%) | 214 (91.8%) | 180 (91.4%)  |                      |
| Slight problems       | 23 (5.4%)   | 11 (4.7%)   | 12 (6.1%)    |                      |
| Moderate problems     | 12 (2.8%)   | 7 (3.0%)    | 5 (2.5%)     |                      |
| Severe problems       | 1 (0.2%)    | 1 (0.4%)    | 0 (0.0%)     |                      |
| Unable                | 0 (0.0%)    | 0 (0.0%)    | 0 (0.0%)     |                      |
| Missing               | 0 (0.0%)    | 0 (0.0%)    | 0 (0.0%)     |                      |
| Pain / Discomfort     |             |             |              | 0.614                |
| No                    | 307 (71.4%) | 172 (73.8%) | 135 (68.5%)  |                      |
| Slight                | 93 (21.6%)  | 46 (19.7%)  | 47 (23.9%)   |                      |
| Moderate              | 27 (6.3%)   | 13 (5.6%)   | 14 (7.1%)    |                      |
| Severe                | 3 (0.7%)    | 2 (0.9%)    | 1 (0.5%)     |                      |
| Extreme               | 0 (0.0%)    | 0 (0.0%)    | 0 (0.0%)     |                      |
| Missing               | 0 (0.0%)    | 0 (0.0%)    | 0 (0.0%)     |                      |
| Anxiety / Depression  |             |             |              | 0.395                |
| No                    | 230 (53.5%) | 124 (53.2%) | 106 (53.8%)  |                      |
| Slightly              | 140 (32.6%) | 80 (34.3%)  | 60 (30.5%)   |                      |
| Moderately            | 49 (11.4%)  | 26 (11.2%)  | 23 (11.7%)   |                      |
| Severely              | 10 (2.3%)   | 3 (1.3%)    | 7 (3.6%)     |                      |
| Extremely             | 1 (0.2%)    | 0 (0.0%)    | 1 (0.5%)     |                      |
| Missing               | 0 (0.0%)    | 0 (0.0%)    | 0 (0.0%)     |                      |
| Days 3                |             |             |              |                      |
| Mobility              |             |             |              | 0.131                |

|                      |             |             |             |       |
|----------------------|-------------|-------------|-------------|-------|
| No problems          | 343 (79.8%) | 193 (82.8%) | 150 (76.1%) |       |
| Slight problems      | 68 (15.8%)  | 31 (13.3%)  | 37 (18.8%)  |       |
| Moderate problems    | 17 (4.0%)   | 7 (3.0%)    | 10 (5.1%)   |       |
| Severe problems      | 2 (0.5%)    | 2 (0.9%)    | 0 (0.0%)    |       |
| Unable               | 0 (0.0%)    | 0 (0.0%)    | 0 (0.0%)    |       |
| Missing              | 0 (0.0%)    | 0 (0.0%)    | 0 (0.0%)    |       |
| Self-Care            |             |             |             | 0.571 |
| No problems          | 370 (86.0%) | 205 (88.0%) | 165 (83.8%) |       |
| Slight problems      | 47 (10.9%)  | 21 (9.0%)   | 26 (13.2%)  |       |
| Moderate problems    | 11 (2.6%)   | 6 (2.6%)    | 5 (2.5%)    |       |
| Severe problems      | 2 (0.5%)    | 1 (0.4%)    | 1 (0.5%)    |       |
| Unable               | 0 (0.0%)    | 0 (0.0%)    | 0 (0.0%)    |       |
| Missing              | 0 (0.0%)    | 0 (0.0%)    | 0 (0.0%)    |       |
| Usual Activities     |             |             |             | 0.361 |
| No problems          | 207 (48.1%) | 117 (50.2%) | 90 (45.7%)  |       |
| Slight problems      | 132 (30.7%) | 75 (32.2%)  | 57 (28.9%)  |       |
| Moderate problems    | 64 (14.9%)  | 30 (12.9%)  | 34 (17.3%)  |       |
| Severe problems      | 21 (4.9%)   | 9 (3.9%)    | 12 (6.1%)   |       |
| Unable               | 6 (1.4%)    | 2 (0.9%)    | 4 (2.0%)    |       |
| Missing              | 0 (0.0%)    | 0 (0.0%)    | 0 (0.0%)    |       |
| Pain / Discomfort    |             |             |             | 0.080 |
| No                   | 145 (33.7%) | 85 (36.5%)  | 60 (30.5%)  |       |
| Slight               | 183 (42.6%) | 99 (42.5%)  | 84 (42.6%)  |       |
| Moderate             | 82 (19.1%)  | 43 (18.5%)  | 39 (19.8%)  |       |
| Severe               | 17 (4.0%)   | 4 (1.7%)    | 13 (6.6%)   |       |
| Extreme              | 3 (0.7%)    | 2 (0.9%)    | 1 (0.5%)    |       |
| Missing              | 0 (0.0%)    | 0 (0.0%)    | 0 (0.0%)    |       |
| Anxiety / Depression |             |             |             | 0.047 |
| No                   | 190 (44.2%) | 108 (46.4%) | 82 (41.6%)  |       |
| Slightly             | 135 (31.4%) | 79 (33.9%)  | 56 (28.4%)  |       |
| Moderately           | 75 (17.4%)  | 37 (15.9%)  | 38 (19.3%)  |       |
| Severely             | 26 (6.1%)   | 8 (3.4%)    | 18 (9.1%)   |       |
| Extremely            | 4 (0.9%)    | 1 (0.4%)    | 3 (1.5%)    |       |
| Missing              | 0 (0.0%)    | 0 (0.0%)    | 0 (0.0%)    |       |
| Week 4               |             |             |             |       |
| Mobility             |             |             |             | 0.278 |
| No problems          | 270 (81.3%) | 149 (84.7%) | 121 (77.6%) |       |
| Slight problems      | 49 (14.8%)  | 22 (12.5%)  | 27 (17.3%)  |       |
| Moderate problems    | 12 (3.6%)   | 5 (2.8%)    | 7 (4.5%)    |       |
| Severe problems      | 1 (0.3%)    | 0 (0.0%)    | 1 (0.6%)    |       |
| Unable               | 0 (0.0%)    | 0 (0.0%)    | 0 (0.0%)    |       |

|                      |             |             |             |       |
|----------------------|-------------|-------------|-------------|-------|
| Missing              | 1 (0.0%)    | 1 (0.0%)    | 0 (0.0%)    |       |
| Self-Care            |             |             |             | 0.068 |
| No problems          | 308 (93.1%) | 167 (94.9%) | 141 (91.0%) |       |
| Slight problems      | 17 (5.1%)   | 5 (2.8%)    | 12 (7.7%)   |       |
| Moderate problems    | 5 (1.5%)    | 4 (2.3%)    | 1 (0.7%)    |       |
| Severe problems      | 1 (0.3%)    | 0 (0.0%)    | 1 (0.7%)    |       |
| Unable               | 0 (0.0%)    | 0 (0.0%)    | 0 (0.0%)    |       |
| Missing              | 2 (0.0%)    | 1 (0.0%)    | 1 (0.0%)    |       |
| Usual Activities     |             |             |             | 0.152 |
| No problems          | 232 (70.1%) | 132 (75.0%) | 100 (64.5%) |       |
| Slight problems      | 75 (22.7%)  | 35 (19.9%)  | 40 (25.8%)  |       |
| Moderate problems    | 20 (6.0%)   | 8 (4.6%)    | 12 (7.7%)   |       |
| Severe problems      | 4 (1.2%)    | 1 (0.6%)    | 3 (1.9%)    |       |
| Unable               | 0 (0.0%)    | 0 (0.0%)    | 0 (0.0%)    |       |
| Missing              | 2 (0.0%)    | 1 (0.0%)    | 1 (0.0%)    |       |
| Pain / Discomfort    |             |             |             | 0.097 |
| No                   | 170 (51.4%) | 95 (54.0%)  | 75 (48.4%)  |       |
| Slight               | 118 (35.6%) | 66 (37.5%)  | 52 (33.5%)  |       |
| Moderate             | 37 (11.2%)  | 13 (7.4%)   | 24 (15.5%)  |       |
| Severe               | 5 (1.5%)    | 2 (1.1%)    | 3 (1.9%)    |       |
| Extreme              | 1 (0.3%)    | 0 (0.0%)    | 1 (0.7%)    |       |
| Missing              | 2 (0.0%)    | 1 (0.0%)    | 1 (0.0%)    |       |
| Anxiety / Depression |             |             |             | 0.605 |
| No                   | 167 (50.5%) | 92 (52.3%)  | 75 (48.4%)  |       |
| Slightly             | 98 (29.6%)  | 53 (30.1%)  | 45 (29.0%)  |       |
| Moderately           | 51 (15.4%)  | 25 (14.2%)  | 26 (16.8%)  |       |
| Severely             | 10 (3.0%)   | 5 (2.8%)    | 5 (3.2%)    |       |
| Extremely            | 5 (1.5%)    | 1 (0.6%)    | 4 (2.6%)    |       |
| Missing              | 2 (0.0%)    | 1 (0.0%)    | 1 (0.0%)    |       |

<sup>a</sup> P values of Freeman-Halton tests comparing BNT162b2 cohort and unvaccinated cohort, excluding category of missing.

**Supplemental Table 3** Mixed Models for Repeated Measurements EQ-5D-5L and WPAI-GH Scores

|                                | EQ VAS       |         | EQ-5D-5L Utility Index<br>(U.S. weights) |         | Absenteeism |         | Presenteeism |         | Work productivity<br>loss |         | Activity impairment |         |
|--------------------------------|--------------|---------|------------------------------------------|---------|-------------|---------|--------------|---------|---------------------------|---------|---------------------|---------|
|                                | Coeff (SE)   | P value | Coeff (SE)                               | P value | Coeff (SE)  | P value | Coeff (SE)   | P value | Coeff (SE)                | P value | Coeff (SE)          | P value |
| Intercept                      | 4.51 (5.36)  | 0.401   | 0.038 (0.062)                            | 0.546   | 53.6 (4.9)  | <0.001  | 41.4 (5.7)   | <0.001  | 57.7 (6.0)                | <0.001  | 41.2 (4.9)          | <0.001  |
| Vaccinated                     |              |         |                                          |         |             |         |              |         |                           |         |                     |         |
| BNT162B2/BNT162b2              | 3.65 (1.46)  | 0.013   | 0.069 (0.019)                            | <0.001  | -19.4 (4.5) | <0.001  | -8.4 (4.2)   | 0.047   | -11.2 (4.4)               | 0.012   | -6.3 (3.1)          | 0.044   |
| No                             | Reference    |         | Reference                                |         | Reference   |         | Reference    |         | Reference                 |         | Reference           |         |
| Assessment Time                |              |         |                                          |         |             |         |              |         |                           |         |                     |         |
| Day 2-4 / Week 1               | Reference    |         | Reference                                |         | Reference   |         | Reference    |         | Reference                 |         | Reference           |         |
| Week 4                         | 9.04 (1.23)  | <0.001  | 0.086 (0.014)                            | <0.001  | -62.9 (3.4) | <0.001  | -30.9 (3.3)  | <0.001  | -48.0 (3.6)               | <0.001  | -28.9 (2.5)         | <0.001  |
| Assessment Time * Vaccinated   |              |         |                                          |         |             |         |              |         |                           |         |                     |         |
| Day 2-4 / Week 1 *<br>BNT162b2 | Reference    |         | Reference                                |         | Reference   |         | Reference    |         | Reference                 |         | Reference           |         |
| Week 4 * BNT162B2              | -0.25 (1.69) | 0.884   | -0.025 (0.020)                           | 0.209   | 22.6 (4.8)  | <0.001  | -0.8 (4.4)   | 0.863   | 2.8 (4.8)                 | 0.561   | -4.0 (3.5)          | 0.257   |
| Pre-COVID-19 Baseline<br>Score | -0.22 (0.05) | <0.001  | -0.177 (0.057)                           | 0.002   | -0.8 (0.0)  | <0.001  | -0.7 (0.1)   | <0.001  | -0.8 (0.1)                | <0.001  | -0.7 (0.0)          | <0.001  |
| Age, years                     |              |         |                                          |         |             |         |              |         |                           |         |                     |         |
| 18-29                          | Reference    |         | Reference                                |         | Reference   |         | Reference    |         | Reference                 |         | Reference           |         |
| 30-49                          | -1.82 (1.45) | 0.211   | -0.011 (0.018)                           | 0.532   | 3.9 (2.4)   | 0.102   | 5.6 (3.0)    | 0.065   | 4.1 (3.2)                 | 0.204   | 7.8 (2.9)           | 0.006   |
| 50-64                          | -2.84 (1.74) | 0.102   | -0.048 (0.021)                           | 0.025   | 10.8 (2.9)  | <0.001  | 6.8 (3.8)    | 0.074   | 7.3 (4.1)                 | 0.075   | 13.7 (3.5)          | <0.001  |
| ≥65                            | -1.86 (2.29) | 0.417   | -0.025 (0.028)                           | 0.367   | 1.7 (5.5)   | 0.760   | 0.3 (7.4)    | 0.964   | -1.4 (7.9)                | 0.863   | 6.9 (4.7)           | 0.139   |
| Gender                         |              |         |                                          |         |             |         |              |         |                           |         |                     |         |
| Male                           | 4.07 (1.30)  | 0.002   | 0.028 (0.016)                            | 0.080   | -2.1 (2.2)  | 0.360   | -6.8 (2.9)   | 0.019   | -5.8 (3.1)                | 0.057   | -9.8 (2.6)          | <0.001  |
| Female                         | Reference    |         | Reference                                |         | Reference   |         | Reference    |         | Reference                 |         | Reference           |         |
| Race / Ethnicity               |              |         |                                          |         |             |         |              |         |                           |         |                     |         |
| White (non-Hispanic)           | Reference    |         | Reference                                |         | Reference   |         | Reference    |         | Reference                 |         | Reference           |         |
| Black/African<br>American      | 2.17 (2.73)  | 0.428   | 0.017 (0.033)                            | 0.613   | -1.8 (5.1)  | 0.726   | 0.8 (6.4)    | 0.899   | 0.1 (7.1)                 | 0.994   | -1.9 (5.6)          | 0.730   |
| Hispanic or Latino             | 0.65 (1.68)  | 0.701   | 0.005 (0.021)                            | 0.818   | -1.9 (3.0)  | 0.530   | 4.3 (3.9)    | 0.268   | 4.8 (4.1)                 | 0.243   | -2.3 (3.4)          | 0.494   |

|                                 |              |       |                |       |            |       |            |       |            |       |            |        |
|---------------------------------|--------------|-------|----------------|-------|------------|-------|------------|-------|------------|-------|------------|--------|
| Asian                           | 4.24 (2.54)  | 0.096 | 0.032 (0.031)  | 0.316 | -1.7 (4.7) | 0.713 | 1.4 (5.8)  | 0.807 | 2.4 (6.3)  | 0.705 | 0.9 (5.2)  | 0.858  |
| Patient refused                 | -0.30 (3.26) | 0.927 | 0.031 (0.040)  | 0.438 | -3.3 (6.1) | 0.589 | 1.1 (8.4)  | 0.897 | -2.3 (9.0) | 0.800 | -6.4 (7.0) | 0.359  |
| Other                           | 2.90 (2.81)  | 0.303 | 0.019 (0.035)  | 0.582 | 3.9 (4.8)  | 0.418 | -6.9 (6.5) | 0.288 | -3.1 (6.9) | 0.661 | -7.5 (5.8) | 0.198  |
| Region                          |              |       |                |       |            |       |            |       |            |       |            |        |
| Northeast                       | 1.91 (2.00)  | 0.341 | 0.015 (0.025)  | 0.534 | 6.2 (3.3)  | 0.057 | -1.9 (4.2) | 0.648 | -0.5 (4.5) | 0.908 | -2.3 (3.9) | 0.551  |
| South                           | 0.87 (1.51)  | 0.568 | -0.002 (0.019) | 0.905 | -1.0 (2.6) | 0.698 | -2.4 (3.3) | 0.466 | -2.4 (3.5) | 0.507 | -2.9 (3.0) | 0.328  |
| Midwest                         | Reference    |       | Reference      |       | Reference  |       | Reference  |       | Reference  |       | Reference  |        |
| West                            | 0.49 (2.08)  | 0.815 | 0.019 (0.026)  | 0.448 | -0.7 (3.4) | 0.830 | -0.8 (4.5) | 0.857 | -1.3 (4.8) | 0.793 | -3.7 (4.2) | 0.374  |
| Social Vulnerability Index      |              |       |                |       |            |       |            |       |            |       |            |        |
| <0.25                           | Reference    |       | Reference      |       | Reference  |       | Reference  |       | Reference  |       | Reference  |        |
| ≥0.25 and <0.5                  | 1.21 (1.45)  | 0.403 | 0.034 (0.018)  | 0.060 | 1.3 (2.4)  | 0.579 | -3.9 (3.0) | 0.196 | -4.6 (3.3) | 0.158 | -5.2 (2.9) | 0.076  |
| ≥0.5 and <0.75                  | 0.93 (1.62)  | 0.568 | 0.020 (0.020)  | 0.321 | 4.7 (2.8)  | 0.090 | -4.8 (3.6) | 0.180 | -6.0 (3.9) | 0.124 | -3.6 (3.3) | 0.276  |
| ≥0.75                           | -2.80 (2.14) | 0.192 | 0.009 (0.026)  | 0.740 | 2.3 (3.7)  | 0.531 | -9.3 (4.7) | 0.048 | -7.8 (5.0) | 0.121 | -5.0 (4.3) | 0.247  |
| Previously tested positive      | 0.99 (1.13)  | 0.381 | 0.003 (0.014)  | 0.816 | -1.9 (2.0) | 0.333 | -0.5 (2.6) | 0.851 | -2.7 (2.8) | 0.329 | -1.2 (2.3) | 0.591  |
| Work in healthcare              | -0.90 (1.80) | 0.616 | -0.018 (0.022) | 0.424 | 3.1 (2.8)  | 0.272 | 0.8 (3.6)  | 0.818 | -0.7 (4.0) | 0.851 | 3.7 (3.6)  | 0.300  |
| Work in high-risk setting       | -2.83 (1.96) | 0.150 | -0.006 (0.024) | 0.790 | 4.7 (3.4)  | 0.166 | 10.3 (4.3) | 0.017 | 13.3 (4.6) | 0.004 | 5.7 (4.0)  | 0.155  |
| Live in high-risk setting       | 1.36 (2.53)  | 0.591 | -0.028 (0.031) | 0.370 | 3.2 (4.7)  | 0.502 | 4.8 (6.0)  | 0.431 | 7.2 (6.5)  | 0.268 | 12.1 (5.0) | 0.017  |
| Immunocompromised               | 1.22 (2.61)  | 0.639 | -0.018 (0.032) | 0.560 | 13.1 (6.1) | 0.033 | 9.9 (8.4)  | 0.243 | 7.9 (9.1)  | 0.385 | 5.5 (5.1)  | 0.282  |
| Number of Symptoms on index day | -0.59 (0.23) | 0.009 | -0.010 (0.003) | 0.001 | 0.8 (0.4)  | 0.048 | 1.3 (0.5)  | 0.008 | 1.9 (0.5)  | 0.001 | 1.8 (0.4)  | <0.001 |



**Supplemental Figure 1** Least-Square Estimates and 95% Confidence Intervals of EQ-5D-5L Scores <sup>a</sup>

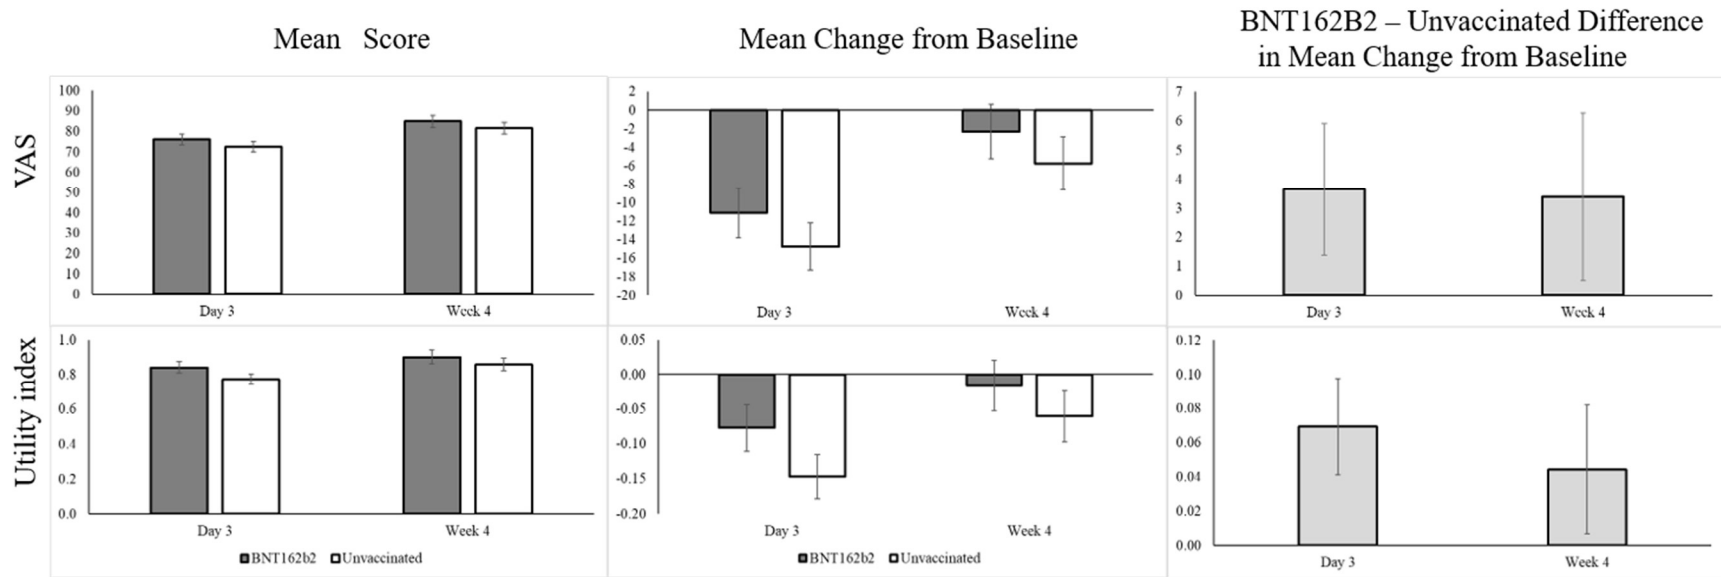

<sup>a</sup> Score ranges: EQ-5D-5L VAS 0 to 100, EQ-5D-5L UI (the United States weights) -0.573 to 1.

**Supplemental Figure 2** Summary Results of EQ-5D-5L scores across time periods <sup>a</sup>

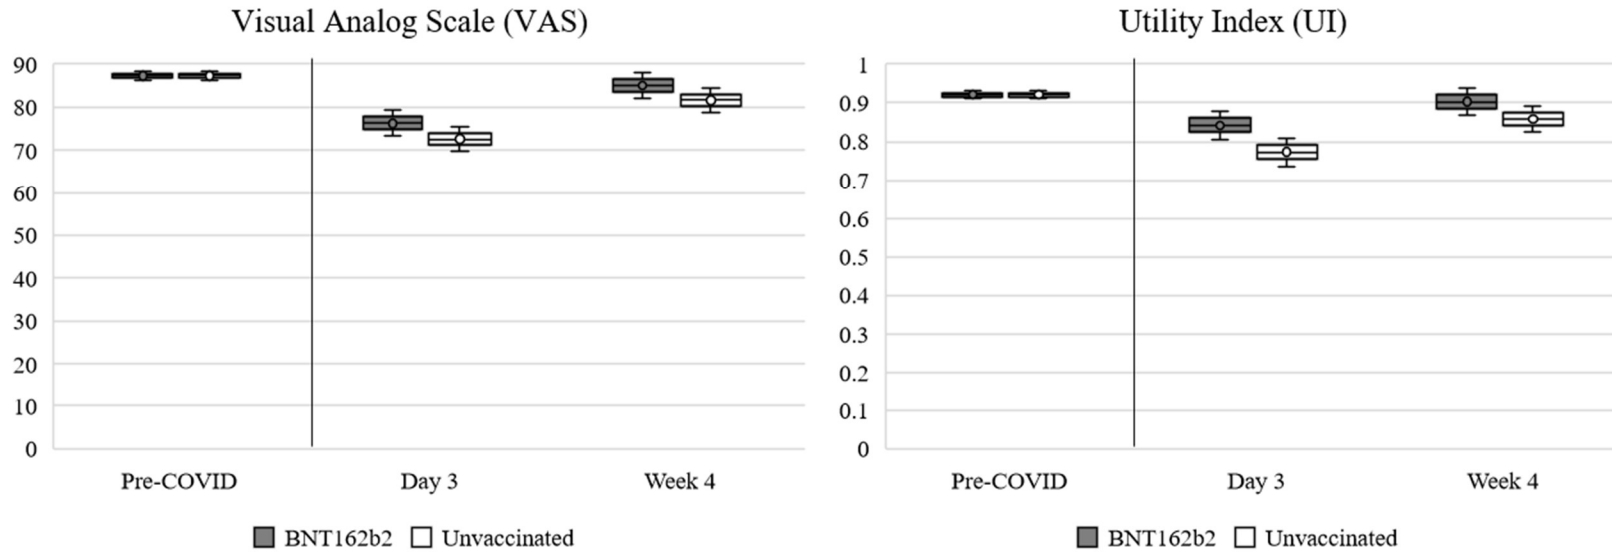

<sup>a</sup> Score ranges: EQ-5D-5L VAS 0 to 100, EQ-5D-5L UI (the United States weights) -0.573 to 1. Dots are the mean values and whiskers are the 95% Confidence Intervals. The Pre-COVID values represent the pooled means with 95% Confidence Internals. The Day 3 and Week 4 values are the least square estimate scores.

**Supplemental Figure 3** Least-Square Estimates and 95% Confidence Intervals of WPAI-GH Scores <sup>a</sup>

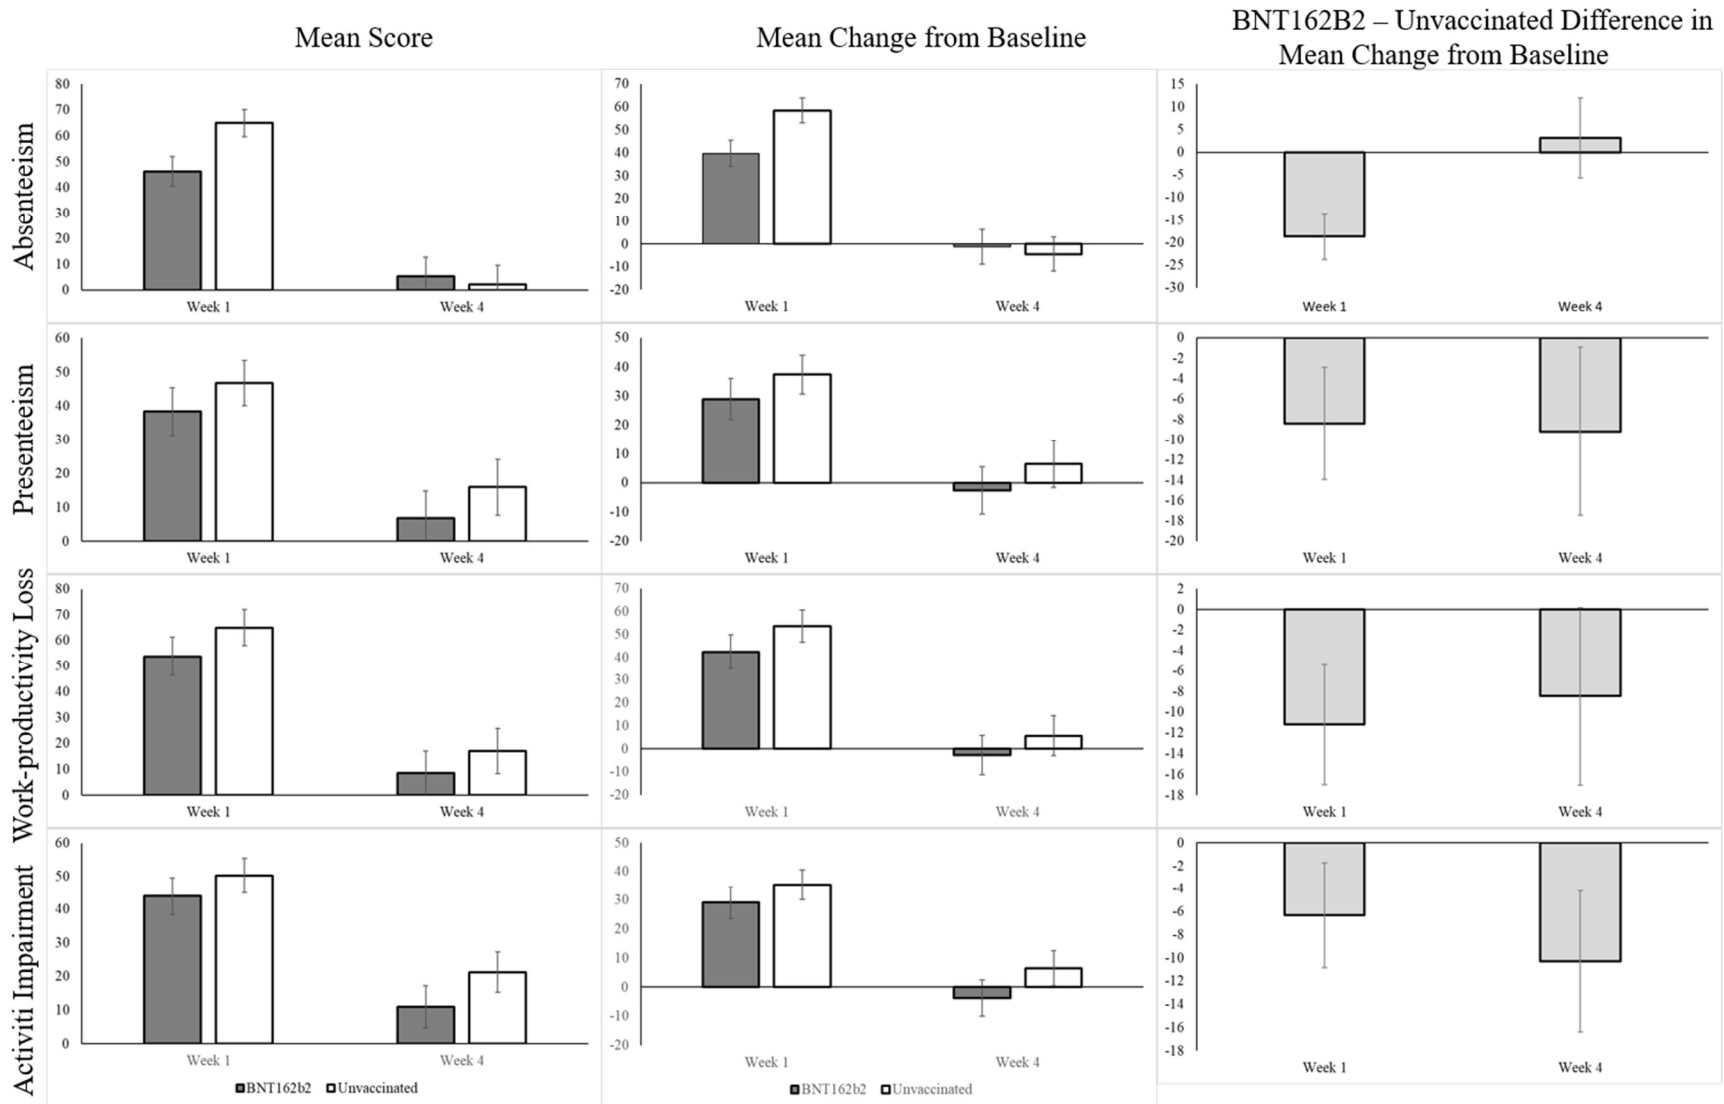

<sup>a</sup> WPAI-GH score (absenteeism, presenteeism, work productivity loss, and activity impairment) ranges from 0 to 100 percent.

**Supplemental Figure 4** Summary Results of WPAI-GH scores across time periods <sup>a</sup>

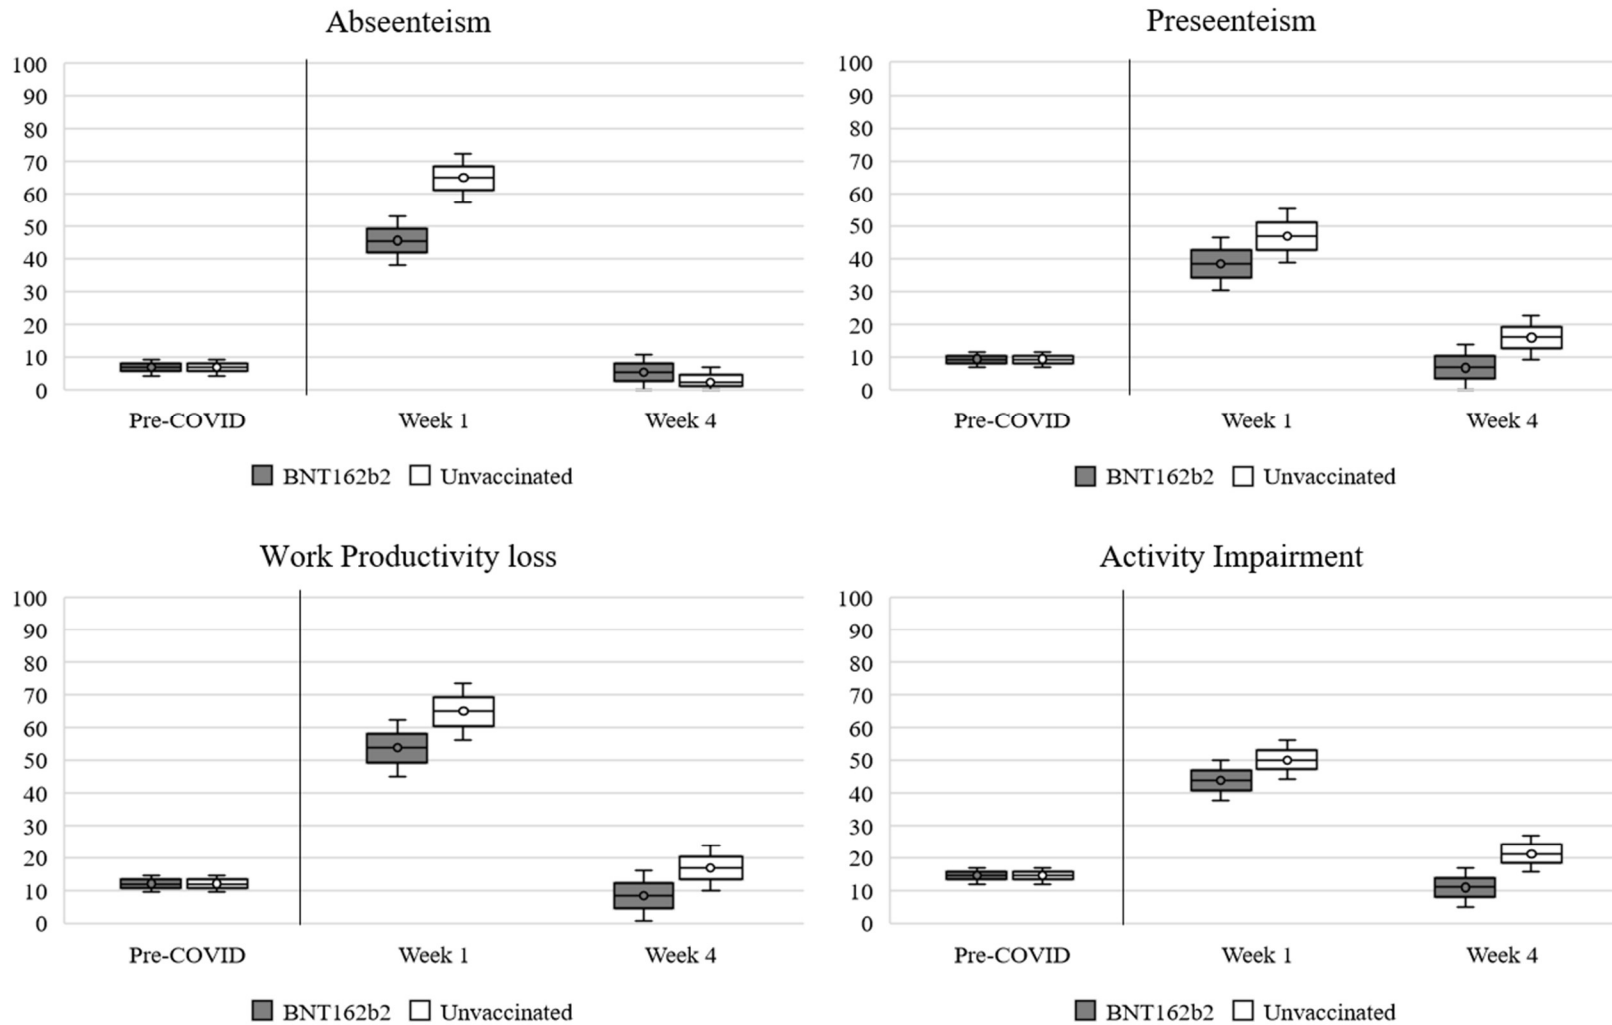

<sup>a</sup> WPAI-GH score (absenteeism, presenteeism, work productivity loss, and activity impairment) ranges from 0 to 100 percent. Dots are the mean values and whiskers are the 95% Confidence Intervals. The Pre-COVID values represent the pooled means with 95% Confidence Internals. The Week 1 and Week 4 values are the least square estimate scores.



**Supplemental Table 4** Model Predicting the Missingness at Week 1 and Week 4

|                                                   | Summary: % (n) / Mean (SD) |                |                | Model        |         |                |
|---------------------------------------------------|----------------------------|----------------|----------------|--------------|---------|----------------|
|                                                   | Total                      | Week 1 Missing | Week 4 Missing | Coeff (SE)   | P value | Odds Ratio     |
| Intercept                                         | 430                        | 11.9% (51)     | 23.0% (99)     | -3.14 (1.19) | 0.009   |                |
| Assessment Time                                   |                            |                |                |              |         |                |
| Week 4                                            | 430                        |                | 23.0% (99)     | 0.85 (0.12)  | <0.001  | 2.3 (1.9, 2.9) |
| Week 1                                            | 430                        | 11.9% (51)     |                | Reference    | .       | 1.0            |
| Vaccination status                                |                            |                |                |              |         |                |
| BNT162b2                                          | 233                        | 12.9% (30)     | 24.5% (57)     | 0.36 (0.26)  | 0.166   | 1.4 (0.9, 2.4) |
| Unvaccinated                                      | 197                        | 10.7% (21)     | 21.3% (42)     | Reference    | .       | 1.0            |
| EQ VAS on Day 3                                   | 72.9<br>(17.5)             | 68.9 (19.1)    | 71.7 (17.3)    | 0.00 (0.01)  | 0.967   | 1.0 (1.0, 1.0) |
| EQ VAS change from pre-COVID-19 baseline to Day 3 | -14.4<br>(14.8)            | -18.2 (18.9)   | -16.0 (16.6)   | -0.01 (0.01) | 0.311   | 1.0 (1.0, 1.0) |
| Age, years                                        |                            |                |                |              |         |                |
| 18-29                                             | 87                         | 8.0% (7)       | 16.1% (14)     | Reference    | .       | 1.0            |
| 30-49                                             | 213                        | 10.3% (22)     | 23.9% (51)     | 0.69 (0.36)  | 0.052   | 2.0 (1.0, 4.0) |
| 50-64                                             | 94                         | 16.0% (15)     | 27.7% (26)     | 0.94 (0.40)  | 0.019   | 2.6 (1.2, 5.6) |
| ≥65                                               | 36                         | 19.4% (7)      | 22.2% (8)      | 0.72 (0.52)  | 0.161   | 2.1 (0.8, 5.6) |
| Gender                                            |                            |                |                |              |         |                |
| Male                                              | 103                        | 4.9% (5)       | 16.5% (17)     | -0.80 (0.32) | 0.013   | 0.4 (0.2, 0.8) |
| Female                                            | 327                        | 14.1% (46)     | 25.1% (82)     | Reference    | .       | 1.0            |
| Race / Ethnicity                                  |                            |                |                |              |         |                |
| White (non-Hispanic)                              | 295                        | 9.8% (29)      | 19.7% (58)     | Reference    | .       | 1.0            |
| Black/African American                            | 20                         | 20.0% (4)      | 35.0% (7)      | 0.67 (0.50)  | 0.184   | 2.0 (0.7, 5.3) |
| Hispanic or Latino                                | 61                         | 11.5% (7)      | 27.9% (17)     | 0.21 (0.36)  | 0.565   | 1.2 (0.6, 2.5) |
| Asian                                             | 22                         | 18.2% (4)      | 27.3% (6)      | 0.37 (0.52)  | 0.480   | 1.4 (0.5, 4.0) |
| Patient refused                                   | 13                         | 30.8% (4)      | 30.8% (4)      | 0.94 (0.62)  | 0.128   | 2.6 (0.8, 8.6) |

|                                 |           |            |            |              |       |                |
|---------------------------------|-----------|------------|------------|--------------|-------|----------------|
| Other                           | 19        | 15.8% (3)  | 36.8% (7)  | 1.22 (0.54)  | 0.024 | 3.4 (1.2, 9.8) |
| Region                          |           |            |            |              |       |                |
| Northeast                       | 52        | 7.7% (4)   | 21.2% (11) | 0.50 (0.48)  | 0.295 | 1.7 (0.6, 4.2) |
| South                           | 252       | 13.5% (34) | 24.6% (62) | 0.32 (0.37)  | 0.378 | 1.4 (0.7, 2.8) |
| Midwest                         | 77        | 6.5% (5)   | 16.9% (13) | Reference    | .     | 1.0            |
| West                            | 49        | 16.3% (8)  | 26.5% (13) | 0.44 (0.47)  | 0.343 | 1.6 (0.6, 3.9) |
| Social Vulnerability Index      |           |            |            |              |       |                |
| <0.25                           | 98        | 12.2% (12) | 22.4% (22) | Reference    | .     | 1.0            |
| ≥0.25 and <0.5                  | 164       | 9.8% (16)  | 19.5% (32) | -0.22 (0.33) | 0.496 | 0.8 (0.4, 1.5) |
| ≥0.5 and <0.75                  | 120       | 12.5% (15) | 25.0% (30) | 0.07 (0.35)  | 0.850 | 1.1 (0.5, 2.1) |
| ≥0.75                           | 48        | 16.7% (8)  | 31.3% (15) | 0.38 (0.45)  | 0.397 | 1.5 (0.6, 3.5) |
| Previously tested positive      | 167       | 15.6% (26) | 26.9% (45) | 0.45 (0.25)  | 0.069 | 1.6 (1.0, 2.5) |
| Work in healthcare              | 47        | 12.8% (6)  | 19.1% (9)  | -0.24 (0.42) | 0.567 | 0.8 (0.3, 1.8) |
| Work in high-risk setting       | 44        | 13.6% (6)  | 22.7% (10) | -0.25 (0.43) | 0.559 | 0.8 (0.3, 1.8) |
| Live in high-risk setting       | 22        | 9.1% (2)   | 27.3% (6)  | 0.38 (0.54)  | 0.484 | 1.5 (0.5, 4.3) |
| Immunocompromised               | 19        | 10.5% (2)  | 15.8% (3)  | -0.33 (0.67) | 0.623 | 0.7 (0.2, 2.7) |
| Number of Symptoms on index day | 5.3 (2.6) | 5.4 (2.6)  | 5.0 (2.5)  | -0.07 (0.05) | 0.188 | 0.9 (0.8, 1.0) |
